## **STAT3 and HIF1 $\alpha$ cooperatively mediate the transcriptional and physiological responses to hypoxia**

Alberto Dinarello<sup>1\*</sup>, Riccardo Massimiliano Betto<sup>2\*</sup>, Chiara Cioccarelli<sup>3</sup>, Linda Diamante<sup>2</sup>, Giacomo Meneghetti<sup>1</sup>, Margherita Peron<sup>1</sup>, Annachiara Tesoriere<sup>1</sup>, Claudio Laquatra<sup>3</sup>, Natascia Tiso<sup>1</sup>, Graziano Martello<sup>1+</sup> and Francesco Argenton<sup>1+</sup>

<sup>1</sup> Department of Biology, University of Padova, Padova, Italy

<sup>2</sup> Department of Molecular Medicine, University of Padova, Padova, Italy

<sup>3</sup> Department of Biomedical Sciences, University of Padova, Padova, Italy

\*these authors contributed equally to this work

+corresponding authors

KEYWORDS: STAT3, HIF1 $\alpha$ , zebrafish, mouse embryonic stem cells.

## ABSTRACT.

STAT3 and HIF1 $\alpha$  are two fundamental transcription factors involved in many merging properties, like angiogenesis, metabolism, and cell differentiation. Notably, under pathological conditions, the two factors have been shown to interact genetically, but both the molecular mechanisms underlying such interactions and their relevance under physiological conditions remains unclear. Here we report that STAT3 is required for the HIF1 $\alpha$ -dependent response to hypoxia. In Stat3 knock-out pluripotent embryonic stem cells (ESCs), a large fraction of HIF1 $\alpha$  target genes is not induced by hypoxia. Mechanistically, STAT3 does not regulate neither HIF1 $\alpha$  expression nor stability, rather, it physically interacts with it in the nucleus. In vivo, we observed that both genetic and chemical inactivation of Stat3 blunted physiological responses to hypoxia, such as angiogenesis, erythropoiesis, and immune cell mobilization. Such defects were accompanied with faulty transcriptional activity of HIF1 $\alpha$ . In sum, our data reveal that STAT3 and HIF1 $\alpha$  cooperatively mediate the physiological response to hypoxia.

## INTRODUCTION

Hypoxia Inducible Factor (HIF) 1 $\alpha$ , the master regulator of cell metabolism in response to low levels of available oxygen, is involved in a wide range of biological processes, such as cancer progression, angiogenesis, and differentiation of pluripotent stem cells (Semenza, 2012; Zhou *et al.*, 2012). HIF1 $\alpha$  is constitutively expressed and generally degraded by Von Hippel Lindau tumor suppressor protein (pVHL) upon hydroxylation by Prolyl Hydroxylase Domain-containing (PHD) enzymes (Masson and Ractliffe, 2003; Kaelin, 2017). In hypoxic conditions PHD3 is unable to hydroxylate HIF1 $\alpha$  that is therefore stable enough to migrate in the nucleus where it generates heterodimers with HIF1 $\beta$ , a stable and constitutively expressed protein (Semenza, 2001). The HIF1 $\alpha$ /HIF1 $\beta$  heterodimer activates the transcription of target genes involved in angiogenesis, cell metabolism, differentiation of pluripotent stem cells, erythropoiesis, and immune cell migration (Rey and Semenza, 2010; Katsuda *et al.*, 2013; Pimpton *et al.*, 2015; Haase, 2013; Gerri *et al.*, 2017; Zhuo *et al.*, 2012). In the last decade, *in vitro* studies revealed connections between HIF1 $\alpha$  and other transcription factors among which Signal Transducer and Activator of Transcription 3 (STAT3) emerged as an important modulator of hypoxia/HIF1 $\alpha$  activity (Pawlus *et al.*, 2014; Grillo *et al.*, 2020). STAT3 is a component of the JAK/STAT pathway that has been claimed to control cell proliferation in cancer and pluripotent stem cells, *via* their transcriptional and metabolic regulation (Avalle *et al.*, 2017; Tengesdal *et al.*, 2021; Carbognin *et al.*, 2016; Betto *et al.*, 2021, Tesoriere *et al.*, 2021).

Under pathological conditions, the crosstalk between JAK/STAT3 and hypoxia/HIF1 $\alpha$  pathways is significant: rheumatoid arthritis is an autoimmune disease characterized by high levels of inflammation due to the crosstalk between STAT3 and hypoxia pathways (Gao

*et al.*, 2015); glucose deprivation in brain pericytes is regulated by STAT3-mediated induction of HIF1 $\alpha$  (Carlsson *et al.*, 2018); the self-renewal of glioma stem-like cells, which was previously considered as a hypoxia-dependent mechanism, appeared to be determined by an upregulation of STAT3 by HIF1 $\alpha$  (Almiron Bonnin *et al.*, 2018). Notably, targeting of STAT3 cascade can block HIF1 and VEGF signaling induced by several oncogenic pathways (Xu *et al.*, 2005).

Additionally, hypoxia has a role in differentiation and proliferation of mouse embryonic stem cells (ESCs): in particular, short exposures to low oxygen tension determine the differentiation of stem cells into definitive endodermal cells and distal lung cells (Pimton *et al.*, 2015); it has been demonstrated that hypoxia and retinoic acid can induce differentiation of mouse ESCs in hepatic progenitor cells (Katsuda *et al.*, 2013); furthermore, HIF1 $\alpha$  has been shown to drive the developmental progression of mouse ESCs (Zhou *et al.*, 2012). Mouse ESCs are characterized by high levels of expression of *Stat3*, which is involved in the maintenance of pluripotency (Matsuda *et al.*, 1999). Indeed, mouse ESCs are cultured in presence of Leukemia Inhibitory Factor (LIF), a cytokine that activates the JAK/STAT3 pathway increasing ESCs self-renewal (Ying *et al.*, 2008; Martello *et al.*, 2013; Wray *et al.*, 2010; Dunn *et al.*, 2014). Mouse ESCs can also be maintained also in a medium containing GSK3 and MEK inhibitors (2i conditions). The use of 2i allowed for the derivation and expansion of Stat3 knockout ESCs (Ying *et al.*, 2008), revealing a role of STAT3 also in the control of metabolism and proliferation (Carbognin *et al.*, 2014; Betto *et al.*, 2021; Huang *et al.*, 2014).

Despite several studies indicating a functional interplay between HIF1 $\alpha$  and STAT3 under pathological conditions, it is not clear whether and how the two transcription factors regulate each other. For this reason, we decided to study at the molecular level the crosstalk between HIF1 $\alpha$  and STAT3 in the context of the physiological response to hypoxia, taking advantage of genetic models developed in zebrafish and ESCs.

## RESULTS

### STAT3 regulates the expression of a specific subset of hypoxia-dependent genes

To analyse the involvement of STAT3 in hypoxia-dependent processes, we decided to perform RNAseq and compare the data of *Stat3*<sup>+/+</sup> and *Stat3*<sup>-/-</sup> cells incubated for 24 hours either in normoxia or in hypoxia (1% O<sub>2</sub> tension). As shown in Fig. 1A and in Fig. S2, the comparison between *Stat3*<sup>+/+</sup> ESCs grown in normoxia or hypoxia revealed a relevant group of differentially expressed genes. In particular, as reported in the Volcano plot (Fig. 1A), the expression of about 1'500 genes is altered in hypoxia and a large part of these genes are upregulated. As expected, genes involved in glycolysis and angiogenesis belong to the subset of upregulated genes. Among them we found *Vascular Epithelial Growth Factor A (Vegfa)*, *Hexokinase 1 (Hk1)*, *Hexokinase 2 (Hk2)*, *Phosphofructokinase (Pfkp)*, *Lactate dehydrogenase A (Ldha)*, *Aldolase A (Aldoa)*, *Phosphoinositide-dependent kinase 1 (Pdk1)* (Fig. 1A). Interestingly, when comparing the number of genes affected by hypoxia in *Stat3*<sup>+/+</sup> and in *Stat3*<sup>-/-</sup> ESCs, we saw that the effect of hypoxia in *Stat3* mutant cells was significantly attenuated: as reported in the box plots of Fig. 1B and B', only 70% of hypoxia-dependent genes are induced by hypoxia in *Stat3* null cells (FC>1 and p-value<0.05). Hence, 30% of hypoxia-responsive genes are not significantly induced when *Stat3* is knocked-out. Of note, the comparison between hypoxic and normoxic *Stat3*<sup>-/-</sup> cells revealed a significant difference in both down- and up-regulated transcripts, however, this response to low oxygen was weaker when compared to the one observed in hypoxic *Stat3*<sup>+/+</sup> ESCs (Fig. 1B,B'). Indeed, the comparison between hypoxic *Stat3*<sup>+/+</sup> and hypoxic *Stat3*<sup>-/-</sup> cells allowed us to identify a subset of hypoxia responsive genes whose induction is significantly dampened in *Stat3*<sup>-/-</sup>

cells. This subset of genes is reported in the heatmap of Fig. 1C and contains canonical Hif1 $\alpha$  targets, such as *Vegfa*, *Hk1*, *Hk2*, *Pfkip* and *Hypoxia lipid droplet-associated (Hilpda)* whose expressions were plotted in Fig. 1D and validated with RT-qPCR in Fig. 1E. Moreover, as shown in Fig. S1, the comparison between *Stat3*<sup>+/+</sup> and *Stat3*<sup>-/-</sup> hypoxic ESCs shows that hypoxia does not affect the expression of STAT3 target genes: as reported in Fig. S1, volcano plot and bar plots reveal that the number of STAT3-dependent genes does not change when cells are incubated in normoxia or in hypoxia; *Stat3* itself and some of its target genes, such as *Socs3*, *Klf4* and *Tet2*, are downregulated in *Stat3* knock-out cells, but they are not differentially expressed when comparing normoxic and hypoxic *Stat3*<sup>+/+</sup> cells (Fig. S1D,E,F,G). We can conclude that STAT3 is required for the induction of hypoxia-dependent genes, including known HIF1 $\alpha$ -targets involved in the regulation of glycolytic metabolism and in vascular remodeling (Fig. S2B). It is worth mentioning that some HIF1 $\alpha$ -dependent genes are affected by hypoxia either in *Stat3*<sup>+/+</sup> and *Stat3*<sup>-/-</sup> cells. In Fig. S2C we show that the expression of *Egln3*, one of the main targets of HIF1 $\alpha$  that encodes for PHD3 and determines the elastic feedback loop of the oxygen deprivation response (Minamishima *et al.*, 2009; Walmsley *et al.*, 2011; Santhakumar *et al.*, 2012), is not affected by *Stat3* mutation.

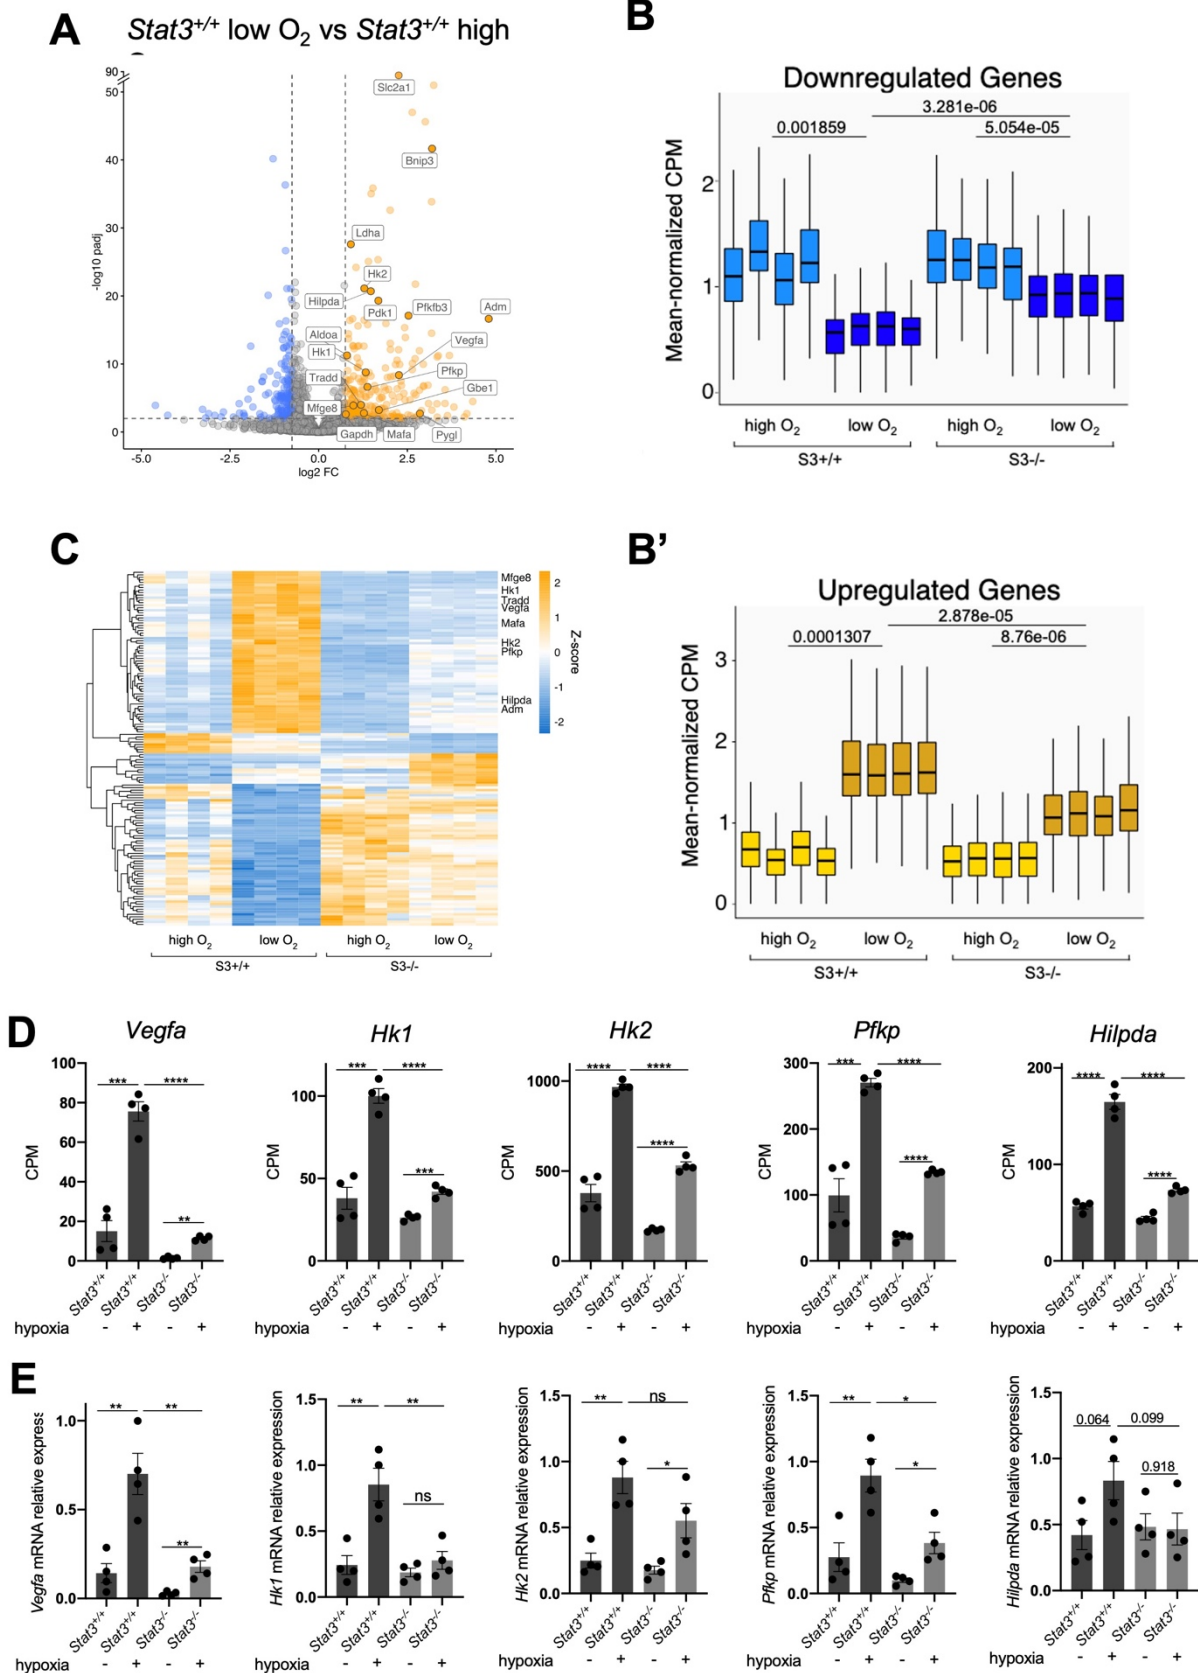



**Fig. 1: STAT3 regulates a subset of hypoxia-dependent genes.** A–D: Transcriptome analysis by RNA-seq. A: Genes that were differentially expressed ( $\log_2[\text{fold change (FC)}] > +0.75$  or  $< -0.75$ ; q-value  $< 0.01$ , Benjamini–Hochberg adjustment, as indicated by dashed lines) between *Stat3<sup>+/+</sup>* cells in normoxia and *Stat3<sup>+/+</sup>* cells in hypoxia; n = 4 biological replicates. B: Expression levels of genes that were down- (B) and upregulated (B') in *Stat3<sup>+/+</sup>* in hypoxia relative to *Stat3<sup>+/+</sup>* cells in normoxia. Each boxplot shows the 1st, 2nd and 3rd quartiles; the whiskers show the minimum and maximum values. C: heatmap of RNAseq data reporting the expression of genes that are affected by hypoxia in *Stat3<sup>+/+</sup>* cells compared to *Stat3<sup>+/+</sup>* normoxic cells, but that require STAT3 to be properly altered in their expression. D: expression level of *Vegfa*, *Hk1*, *Hk2*, *Pfkfb* and *Hilpda* in normoxic and hypoxic *Stat3<sup>+/+</sup>* and *Stat3<sup>-/-</sup>* mESCs. E: Gene expression analysis by RT–qPCR of *Stat3<sup>+/+</sup>* and *Stat3<sup>-/-</sup>* cells treated in normoxic and hypoxic mESCs of the same genes shown for the RNAseq. Mean $\pm$ SEM of n = 4 experiments, with each replica shown as a dot. \*p<0.05, \*\*p<0.01, \*\*\*p<0.001, \*\*\*\*p<0.0001.

To understand how STAT3 regulates hypoxia-dependent gene expression, we decided to study the crosstalk between STAT3 and HIF1 $\alpha$ . We first asked whether the expression levels of *Hif1 $\alpha$*  mRNA are affected by the genetic ablation of *Stat3*. Interestingly, as reported in Fig. 2A, there are no significant differences in the expression of *Hif1 $\alpha$*  in *Stat3<sup>-/-</sup>* cells compared to *Stat3<sup>+/+</sup>*. Therefore, we sought to assess whether STAT3 is involved in the stabilization of HIF1 $\alpha$  in hypoxia. Interestingly, as reported in Fig. 2B, western blot analysis revealed that hypoxia can stabilize HIF1 $\alpha$  both in *Stat3<sup>+/+</sup>* and in *Stat3<sup>-/-</sup>* cells. Once demonstrated that in mouse ESCs STAT3 is neither involved in the expression of *Hif1 $\alpha$*  mRNA nor in HIF1 $\alpha$  protein stabilization, we decided to test whether STAT3 might interact directly with HIF1 $\alpha$ . To do so, we performed Proximity Ligation Assay (PLA) and found that PLA positive dots could be detected only in murine *Stat3<sup>+/+</sup>* ESCs grown at low oxygen tensions (Fig. 2C), revealing that STAT3 and HIF1 $\alpha$  interact with each other in hypoxic conditions. Furthermore, the cellular localization of dots indicates that the interaction between the two transcription factors occurs in the nucleus.

Next, we tested whether the interaction between STAT3 and HIF1 $\alpha$  can be observed also in pseudohypoxia. Pseudohypoxia is a condition that occurs whenever HIF1 $\alpha$  is stabilized even if the organism is exposed to atmospheric oxygen tensions. This phenomenon can be chemically triggered by some compounds like cobalt chloride (CoCl<sub>2</sub>) which substitutes with Co<sup>2+</sup> the Fe<sup>2+</sup> ion necessary for the catalytic activity of PHD, hence inactivating the enzyme (Triantafyllou *et al.*, 2006; Elks *et al.*, 2015; Munos-Sanchez and Chanez-Cardenas, 2018). As expected, wild type ESCs incubated for 24 hours with CoCl<sub>2</sub> were characterized by high levels of expression of HIF1 $\alpha$  target genes *Vegfa* and *Hk2* compared to untreated *Stat3*<sup>+/+</sup> cells. In contrast, *Stat3*<sup>-/-</sup> cells incubated with CoCl<sub>2</sub> did not show significant upregulation of these transcripts (Fig. S2D,E), while *Hif1 $\alpha$*  mRNA levels were not affected by the treatment. On the other hand, *Egln3*, which is a pure target gene of HIF1 $\alpha$  involved in the elastic feedback loop of the oxygen deprivation response (Minamishima *et al.*, 2009), was not affected by the absence of *Stat3* (Fig. S2F,G). Interestingly, PLA analysis performed on ESCs treated with CoCl<sub>2</sub> confirms the interaction between STAT3 and HIF1 $\alpha$  (Fig. S2H). These results suggest that the formation of a nuclear STAT3-HIF1 $\alpha$  complex is associated with full activation of hypoxia responsive genes.

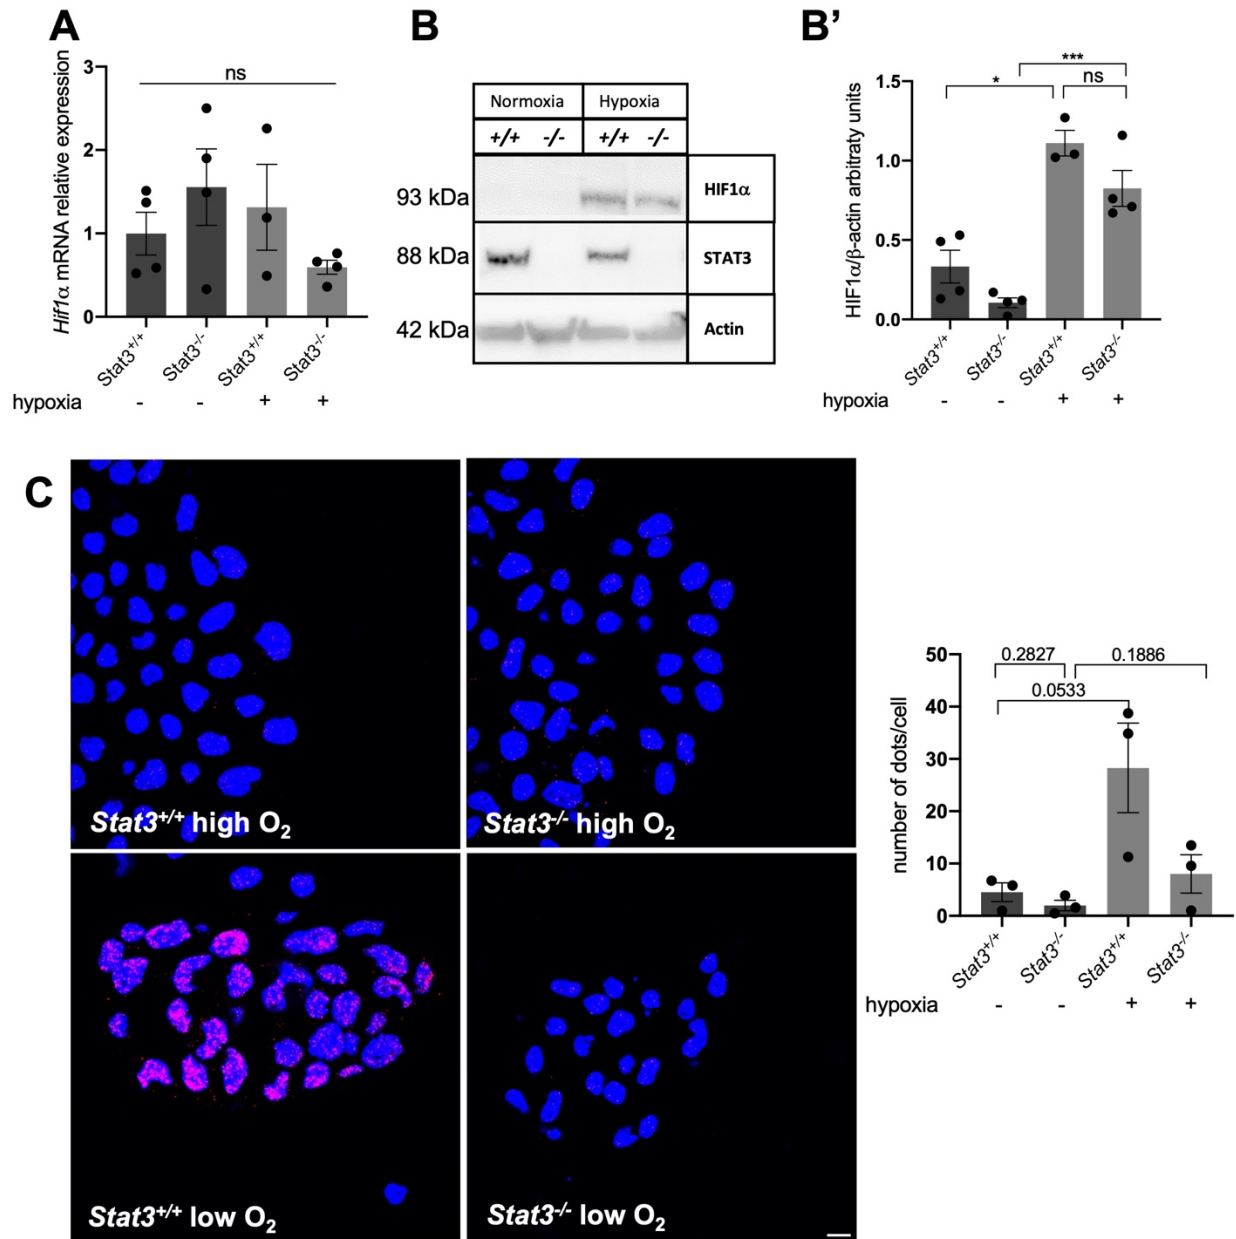

**Fig. 2: STAT3 physically interacts with HIF1α.** A: RT-qPCR analysis of *Hif1α* mRNA expression on murine *Stat3*<sup>+/+</sup> and *Stat3*<sup>-/-</sup> murine ESCs incubated either in low and in high oxygen tensions. B: western blot analysis of HIF1α and STAT3 from protein extracts of *Stat3*<sup>+/+</sup> and *Stat3*<sup>-/-</sup> murine ESCs incubated either in low and in high oxygen tensions. Representative pictures (B) and quantifications (B'). β-Actin was used as an internal control. 4 independent biological replicates were used. C: PLA with anti-STAT3 and anti-HIF1α antibodies (scale bar=200 μm). Quantification of dots divided for the number of nuclei detected with DAPI (blue) (C'). n=3 independent biological replicates were used. Scale bar = 200 μm. Mean±SEM. \*p<0.05, \*\*\*p<0.001; ns = not significant.

## **Hif1 $\alpha$ transcriptional activity is not induced *in vivo* when Stat3 is knocked-out or inhibited.**

Zebrafish is an *in vivo* model in which the pathophysiological roles of HIF1 $\alpha$  and JAK/STAT signalling have been extensively studied (Santhakumar *et al.*, 2012; Gerri *et al.*, 2017; Gerri *et al.*, 2018; Vettori *et al.*, 2017; Marchi *et al.*, 2020; Liu *et al.*, 2017; Peron *et al.*, 2020; Peron *et al.*, 2021). Thus, it appeared as an ideal platform to analyze the STAT3-HIF1 $\alpha$  crosstalk. We used the *Tg(4xHRE-TATA:mCherry,cmlc2:EGFP)<sup>ia22</sup>* hypoxia reporter zebrafish line (herein called HRE:mCherry), in which the mCherry red fluorescent protein is expressed in all tissues experiencing low oxygen tensions or pseudohypoxic conditions (Vettori *et al.*, 2017). To investigate the requirement of Stat3 in the transcriptional response to hypoxia, we combined hypoxic and pseudohypoxic treatments with chemical or genetic inhibition of Stat3. To inhibit Stat3 signaling we used AG490, which blocks the Jak-mediated Y705 phosphorylation of Stat3 and abrogates its nuclear transcriptional activity (Park *et al.*, 2014; Peron *et al.*, 2020; Peron *et al.*, 2021). Larvae treated with this compound were also characterized by a reduction of *stat3* gene expression (Fig. S3A). To induce hypoxia in zebrafish larvae, we incubated the animals for 3 days with 5% oxygen tension, while pseudohypoxia was forced by using either dimethyloxalylglycine (DMOG), an inhibitor of Phd-dependent degradation of Hif1 $\alpha$  (Mole *et al.*, 2003); CoCl<sub>2</sub> or dexamethasone (Dex), a synthetic glucocorticoid that contributes to the stabilization of Hif1 $\alpha$  by degrading Vhl (Vettori *et al.*, 2017). Notably, while hypoxia and pseudohypoxia induced the fluorescence of HRE:mCherry zebrafish larvae, such induction was completely abolished by AG490, suggesting that, also in zebrafish, activated Stat3 is necessary for the correct induction of hypoxia-dependent transcription (Fig. 3A). Moreover, we tested the expression of *vegfa* and

*hk1* at different times of exposure to low oxygen tension. We could observe that hypoxia determines a boost of expression of both *vegfa* and *hk1* after 8 hours of incubation in hypoxia; after 24 hours of incubation in hypoxic conditions, both transcripts return to the levels detected in normoxic larvae. Interestingly, *vegfa* expression increased after 72 hours of hypoxia, while *hk1* expression was upregulated after 48 hours of hypoxia (Fig. S3B,C). AG490 completely abrogated this hypoxia-dependent dynamical expression of *vegfa* and *hk1*, confirming the results obtained with the HRE:mCherry reporter line and with ESCs (Fig. S3B,C).

Next, we crossed the *stat3<sup>ia23</sup>* mutant zebrafish line (herein called *stat3<sup>-/-</sup>*) (Peron *et al.*, 2020) with the HRE:mCherry reporter line. We treated the HRE:mCherry;*stat3<sup>+/+</sup>*, HRE:mCherry;*stat3<sup>+/-</sup>* and HRE:mCherry;*stat3<sup>-/-</sup>* sibling larvae with 5% oxygen tension and measured mCherry fluorescence. Consistent with previous results obtained in ESC cells and in embryos treated with AG490, the Hif1 $\alpha$ -dependent reporter activity increased in hypoxic *stat3<sup>+/+</sup>* larvae, while no significant increase of the reporter fluorescence was detected in hypoxic *stat3<sup>+/-</sup>* and *stat3<sup>-/-</sup>* larvae when compared with normoxic siblings (Fig. 3B). These results indicate that the transcriptional activation of HIF1 $\alpha$  targets requires STAT3 also *in vivo*.

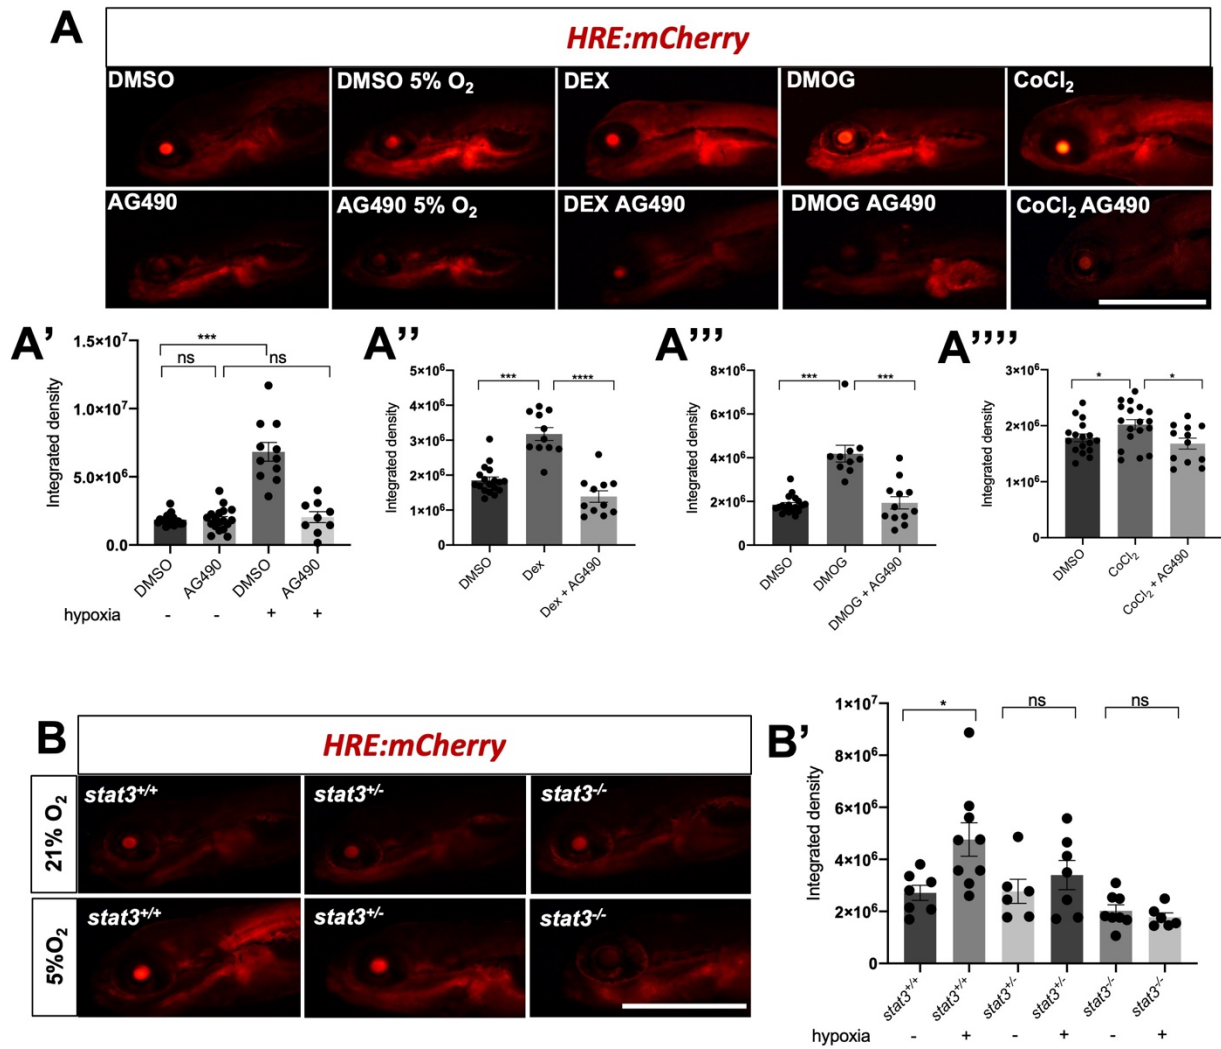

Fig. 4: **Stat3 is necessary for Hif1 $\alpha$  transcriptional activity.** A: Representative pictures of HRE:mCherry reporter zebrafish treated with AG490 in combination with low oxygen tension, DMOG, and Dex from 3-6 dpf and CoCl<sub>2</sub> from 5-6 dpf. A': Fluorescence quantification of HRE:mCherry reporter zebrafish treated with AG490 in combination with low oxygen tension (n=10). A'': Fluorescence quantification of HRE:mCherry reporter zebrafish treated with AG490 in combination with 50  $\mu$ M DMOG. A''': Fluorescence quantification of HRE:mCherry reporter zebrafish treated with AG490 in combination with 10  $\mu$ M Dex from 3-6 dpf. A''': Fluorescence quantification of HRE:mCherry reporter zebrafish treated with AG490 in combination with 0.1 mM CoCl<sub>2</sub> from 5-6 dpf. Scale bar 500  $\mu$ m. B: representative pictures of *stat3*<sup>+/+</sup>, *stat3*<sup>+/-</sup> and *stat3*<sup>-/-</sup> sibling larvae in HRE:mCherry transgenic background treated with low oxygen tension from 3-6 dpf. B': Fluorescence quantification of *stat3*<sup>+/+</sup>, *stat3*<sup>+/-</sup> and *stat3*<sup>-/-</sup> sibling larvae in HRE:mCherry transgenic background treated with low oxygen tension from 3-6 dpf. Scale bar = 500  $\mu$ m. Mean  $\pm$  SEM. \*p<0.05, \*\*p<0.01, \*\*\*p<0.001, \*\*\*\*p<0.0001, ns=not significant.

## **Nuclear crosstalk between Stat3 and Hif1 $\alpha$ determines the regulation of hypoxia-dependent genes in zebrafish**

Given that Stat3 is needed for the induction of normal Hif1 $\alpha$  transcriptional activities and that hypoxia-induced mechanisms are impaired when Stat3 is inhibited or deleted, we wanted to determine by which mechanisms Stat3 regulates Hif1 $\alpha$  transcriptional activity.

We first tested whether Stat3 inactivation would affect *hif1 $\alpha$*  expression levels, its stabilization, or the levels of HIF1 $\alpha$  regulators *vhl* and *egln3*; we observed no significant differences in their expression levels when comparing *stat3*<sup>+/+</sup> and *stat3*<sup>-/-</sup> 6-dpf larvae (Fig. S4A-D). We conclude that, as already observed in ESCs (Fig. 2B), the lack of a functional Stat3 does not impair the expression and stabilization of Hif1 $\alpha$  in zebrafish larvae.

Given that in ESCs, STAT3 and HIF1 $\alpha$  interact in the nucleus, we focussed our attention on the nuclear activity of HIF1 $\alpha$  *in vivo*. For this purpose, we injected an mRNA that encodes a dominant active (DA) form of *hif1ab* bearing mutations at two prolines and one asparagine (P402A, P564G, N804A), hence preventing their hydroxylation by Phd and subsequent Vhl-dependent degradation (Elks *et al.*, 2011; Elks *et al.*, 2013). In other words, this construct activates by default nuclear targets, independently from any upstream degrading cue. We treated HRE:mCherry hypoxia reporter larvae injected with *hif1ab* DA mRNA at 3 dpf with AG490 and analysed the reporter fluorescence at 4 dpf. Notably, *hif1ab* DA mRNA determines an induction of the reporter activity that is significantly decreased in injected larvae treated with AG490 (Fig. 4A). We further investigated the endogenous genes induced by *hif1ab* DA mRNA by performing RT-qPCR analysis. The expression levels of Hif1 $\alpha$ -dependent genes, such as *vegfa* and *hk1* were induced by *hif1ab* DA mRNA, however, AG490 completely

abrogated their upregulation (Fig. 4B,C). These results confirmed *in vivo* that activation of HIF1 $\alpha$  nuclear targets rely on active STAT3, as observed in mouse ESCs.

Additionally, we took advantage of the zebrafish model to ask whether HIF1 $\alpha$  and STAT3 are active in the same cells (cell autonomously), or whether they co-operate non-cell-autonomously in distinct cells somehow interconnected. To do so, we used the Stat3 reporter line *Tg(7xStat3-Hsv.Ul23:EGFP)<sup>ia28</sup>* (Peron *et al.* 2020), and sorted Stat3 responsive intestinal stem cells. Results of RT-qPCR revealed a strong and significant upregulation of Hif1 $\alpha$  transcriptional activity in EGFP sorted cells. In particular, *hif1ab* transcript levels were 20-fold higher in EGFP-positive cells compared to EGFP-negative cells. The upregulation of the *vegfa* and *hk1*, involved in angiogenesis and glucose metabolism, as well as of the pure Hif1 $\alpha$  target gene *egln3*, involved in the Hif1 $\alpha$  degradation feedback loop (Minamishima *et al.*, 2009), revealed a massive Hif1 $\alpha$  transcriptional activity in the EGFP-positive Stat3-responsive cells (Fig 4D). *flna*, a gene that is neither affected by Stat3 nor by Hif1 $\alpha$  was used in this experiment as a negative control. We conclude that in the context of a complex tissue like the intestine, HIF1 $\alpha$  direct targets are strongly expressed in cells with active STAT3, further indicating cooperative transcriptional activation by the two factors.



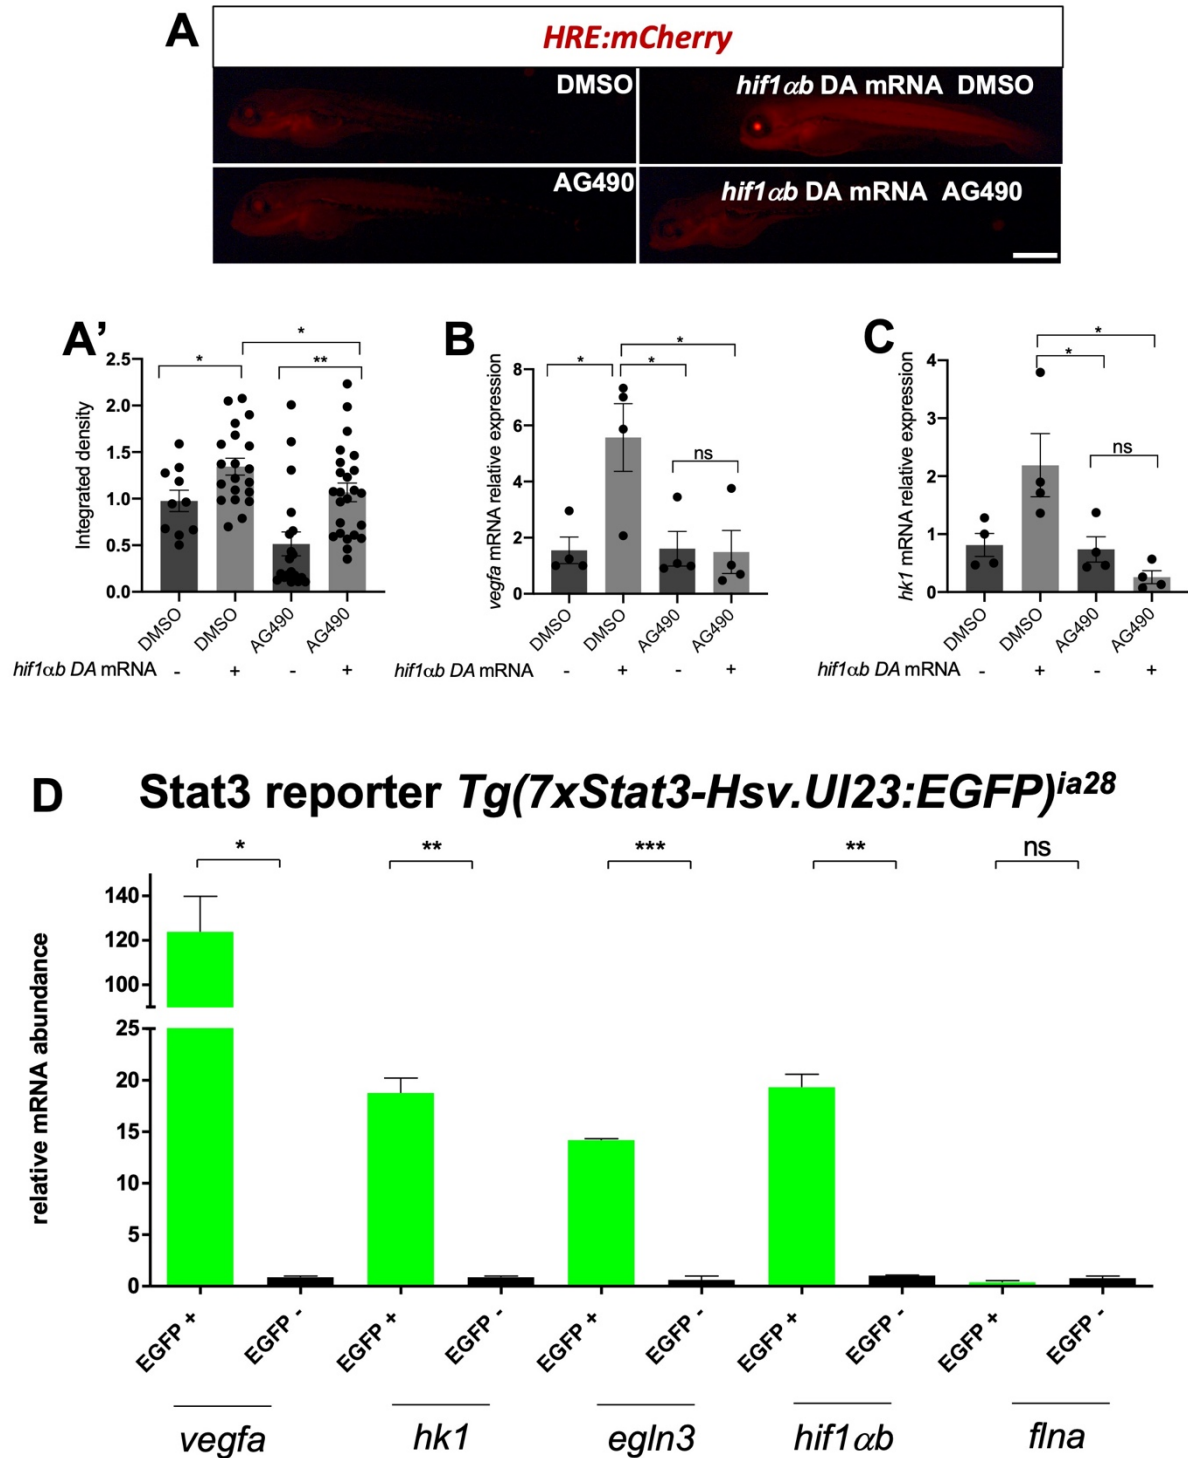

Fig. 4: **Stat3** and **Hif1α** cooperate in the nucleus for the transcription of **Hif1α** target genes. A: representative pictures (A) and fluorescence quantification (A') of 4-dpf HRE:mCherry reporter larvae treated with either DMSO or 50 μM AG490 for 24 hours after injection of *hif1αb* DA mRNA. B: RT-qPCR analysis of *vegfa* of 4-dpf larvae injected with *hif1αb* DA mRNA

and treated with AG490. C: RT-qPCR analysis of *hk1* of 4-dpf larvae injected with *hif1ab* DA mRNA and treated with AG490. For all the experiments of RT-qPCR 3 independent biological replicates composed by pool of 15 larvae were used. D: RT-qPCR analysis of *vegfa*, *hk1*, *egln3*, and *hif1ab* on EGFP-positive and EGFP-negative cells sorted from *ia28* transgenic adult intestines (n=3). Mean±SEM. \*p<0.05; \*\*p<0.01; \*\*\*p<0.001; ns = not significant.

## **Hypoxia-dependent processes are impaired in *stat3* mutant zebrafish**

Our results so far indicate a cooperative activation of STAT3 and HIF1 $\alpha$  in the transcriptional response to hypoxia. We then asked whether such cooperation is important also for the physiological responses in an organism.

One of the most relevant processes induced by hypoxia is angiogenesis (Fraisl *et al.*, 2009). To study how this process is affected by hypoxia in *stat3* mutant zebrafish larvae, we decided to use the zebrafish endothelial cell reporter line *Tg(Fli1:EGFP)<sup>y1</sup>* (Lawson and Weinstein, 2002). *stat3<sup>+/+</sup>*, *stat3<sup>+/-</sup>* and *stat3<sup>-/-</sup>* sibling larvae in *Tg(Fli1:EGFP)<sup>y1</sup>* transgenic background were treated with 5% oxygen tension from 48 hpf to 54 hpf. After the treatment, we detected a significant increase of endothelial fluorescence in *stat3<sup>+/+</sup>* hypoxic larvae when compared with untreated siblings (Fig. 5 A), indicating that angiogenesis is induced by low oxygen tensions, hence confirming what already observed by Eyries *et al.* (2008). A similar induction of fluorescence was also detected in hypoxic heterozygous *stat3<sup>+/-</sup>* larvae when compared to normoxic heterozygous siblings, but no significant differences were detected between normoxic and hypoxic null *stat3<sup>-/-</sup>* larvae, indicating a pivotal role of Stat3 in this process (Fig. 5 A).

Hypoxia plays a central role in erythropoiesis (Haase, 2010; Zhang *et al.*, 2012; Solak *et al.*, 2016; Kietzmann, 2020) and in zebrafish *gata1* is a specific marker for erythropoiesis and erythrocytes (Lyons *et al.*, 2002; Galloway *et al.*, 2005; Bresciani *et al.*, 2010; Quintana *et al.*,

2014; Li *et al.*, 2014; Lenard *et al.*, 2016). Hence, we decided to use the *Tg(gata1:dsRed)<sup>sd2</sup>* transgenic line (Galloway *et al.*, 2005), in which erythroid cells display a strong red fluorescence, to see whether Stat3 has a role in hypoxia-induced erythropoiesis. Notably, 6-hour long hypoxia treatments determine a significant increase of fluorescence in *stat3<sup>+/+</sup>*. Similarly, an upregulation of fluorescence was detected also in hypoxic *stat3<sup>+/-</sup>* larvae. Of note, no significant differences were detected between normoxic and hypoxic *stat3<sup>-/-</sup>* larvae, demonstrating that Stat3 is essential for the hypoxia induced erythropoiesis (Fig. 5B).

Since the hypoxia/HIF1 pathway has been linked to mobilization and polarization of macrophages (Lewis *et al.*, 1999; Elks *et al.*, 2013; Ke *et al.*, 2019; Lewis and Elks, 2019; Sadiku and Walmsley, 2019), we used the *Tg(LysC:dsRed)<sup>nz50</sup>* transgenic line (Hall *et al.*, 2007), to focus our attention on them. First, to confirm that the migration of macrophages outside the aorta-gonad-mesonephros (AGM) region is triggered by hypoxia and relies on Hif1 $\alpha$ , we injected 1-cell stage *Tg(LysC:dsRed)<sup>nz50</sup>* transgenic embryos with a solution containing both morpholinos (MO) against *hif1aa* and *hif1ab* (as previously described in Gerri *et al.*, 2017). 48-hpf controls and *hif1 $\alpha$*  morphants were subsequently incubated in normoxia or hypoxia for 6 hours and the number of macrophages was counted. As reported in Fig. 5C and Fig. S5A, hypoxia determines an increase of the ratio between the number of cells observed in the trunk of larvae (named region A) and that in the AGM (named region B), suggesting that hypoxia determines the migration of macrophages away from AGM. Interestingly, we could not detect significant differences between normoxic and hypoxic morphants, demonstrating that Hif1 $\alpha$  is required for this process. Subsequently, we sought to see whether Stat3 is also involved in this process. To do so, we treated 48-hpf *stat3<sup>+/+</sup>*, *stat3<sup>+/-</sup>* and *stat3<sup>-/-</sup>* larvae *Tg(LysC:dsRed)<sup>nz50</sup>* transgenic background with 5% oxygen tension

for 6 hours. Treated *stat3*<sup>+/+</sup> and *stat3*<sup>-/-</sup> showed a significant increase of Area A/Area B ratio compared to untreated siblings, while hypoxia did not have any effect in mobilizing macrophages of *stat3*<sup>-/-</sup> larvae, suggesting that Stat3 is involved in this Hif1 $\alpha$ -dependent process (Fig. 5D and Fig. S5B). Moreover, genes involved in macrophage migration, like *mfap4* and *tek*, appeared to be downregulated in their expression in *stat3*<sup>-/-</sup> when compared to *stat3*<sup>+/+</sup> siblings (Fig. S5C). Importantly, the total number of dsRed-positive cells does not seem to be affected significantly by genetic ablation of *stat3*, indicating a specific effect on migration rather than survival or proliferation (Fig. S5B,C).

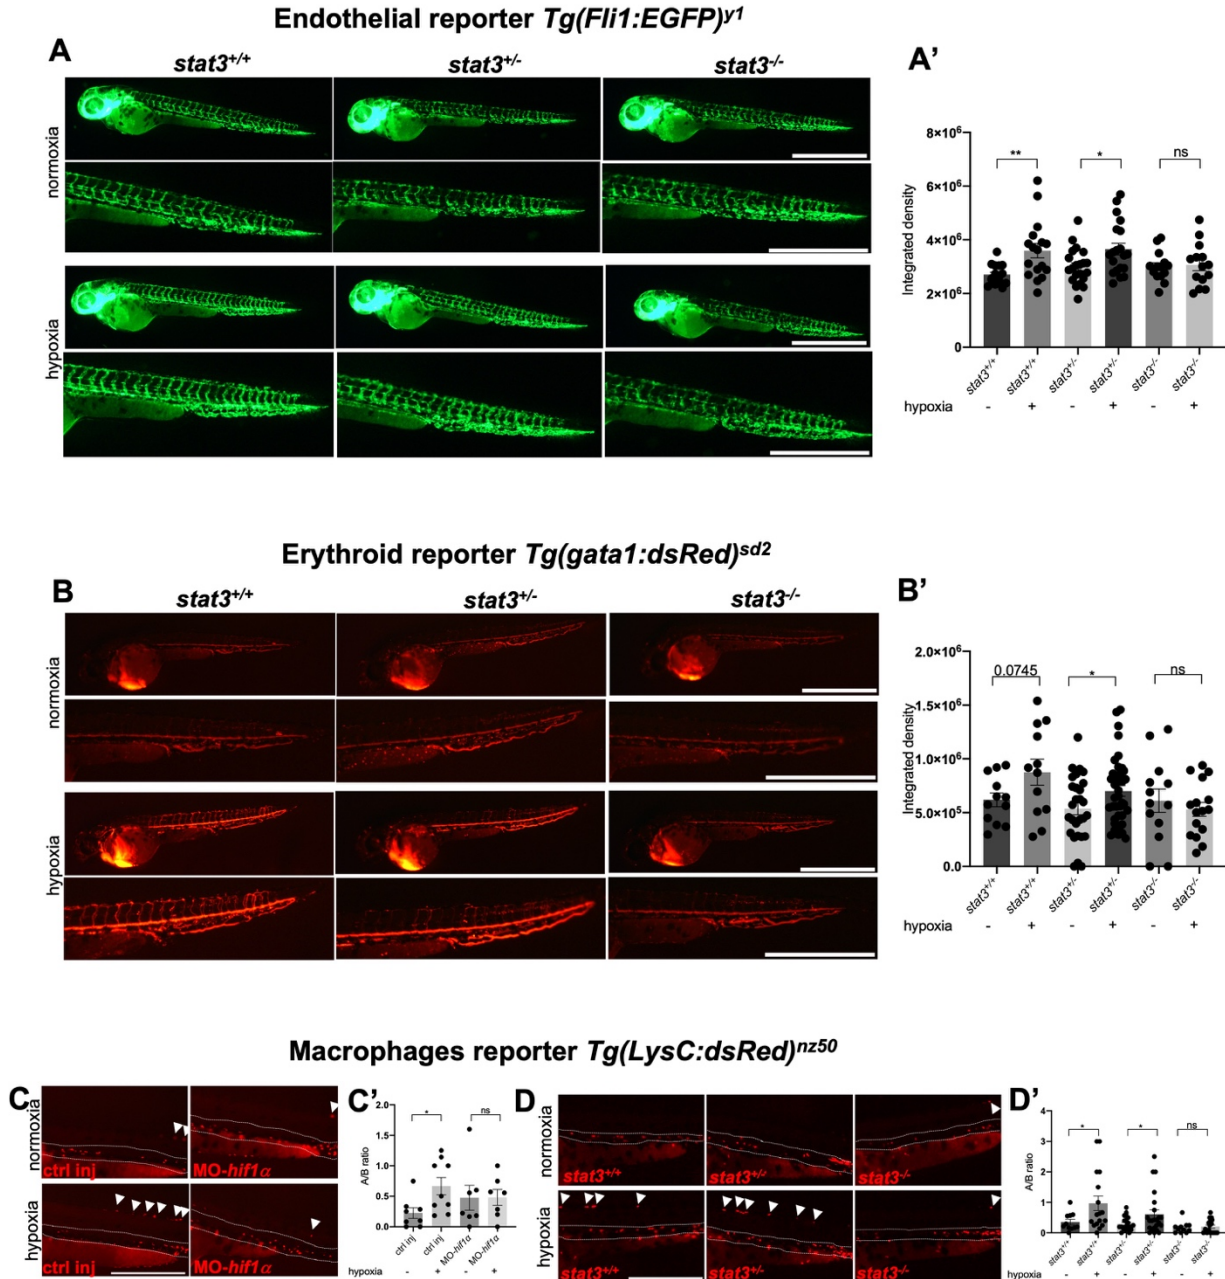

Fig. 5: *stat3* genetic ablation affects angiogenesis, and macrophage migration. A: Representative pictures (A) and fluorescence quantification of the trunk (A') of 54-hpf *stat3<sup>+/+</sup>*, *stat3<sup>+/-</sup>* and *stat3<sup>-/-</sup>* in *Tg(Fli1:EGFP)<sup>y1</sup>* transgenic background incubated in normoxia and hypoxia for 6 hours. Scale bar: 1 mm. B: Representative pictures (B) and fluorescence quantification of the tail (B') of 54-hpf *stat3<sup>+/+</sup>*, *stat3<sup>+/-</sup>* and *stat3<sup>-/-</sup>* larvae in *Tg(gata1:dsRed)<sup>sd2</sup>* transgenic background incubated in normoxia and hypoxia. Scale bar: 1 mm. C: Representative pictures of 54-hpf control (ctrl inj) and *hif1 $\alpha$*  morphants (MO-*hif1 $\alpha$* ) in *Tg(LysC:dsRed)<sup>nz50</sup>* transgenic background incubated in normoxia and hypoxia for 6 hours (scale bar: 500  $\mu$ m); quantification of the ratio of dsRed-positive cells in region A and in region B (C'). Area B between dashed

lines. Arrowheads point at fluorescent cells in Area A. D: Representative pictures of 54-hpf *stat3<sup>+/+</sup>*, *stat3<sup>+/-</sup>* and *stat3<sup>-/-</sup>* larvae in *Tg(LysC:dsRed)<sup>nz50</sup>* transgenic background incubated in normoxia and hypoxia for 6 hours (scale bar: 500  $\mu$ m); quantification of the ratio of dsRed-positive cells in region A and in region B (D'). Area B between dashed lines. Arrowheads point at fluorescent cells in Area A. Mean $\pm$ SEM. \* $p$ <0.05; \*\* $p$ <0.01; \*\*\* $p$ <0.001; ns=not significant.

## DISCUSSION

In the last 20 years, several research groups suggested an interplay between STAT3 and HIF1: for instance, Gray and collaborators in 2005 demonstrated that the expression of *Vegfa* in pancreatic and prostate carcinomas depends on HIF1 $\alpha$ , STAT3, CBP/p300 and Ref-1/APE (Gray *et al.*, 2005) and this result was further investigated by Oh and collaborators (2011), who demonstrated that STAT3 and HIF1 $\alpha$  bind the *Vegfa* promoter (Oh *et al.*, 2011). However, up to now, no clear description of STAT3-HIF1 $\alpha$  connections have been provided yet and the mechanisms through which STAT3 and HIF1 $\alpha$  regulate each other is still controversial: some groups demonstrated that STAT3 triggers the expression of *HIF1 $\alpha$*  mRNA (Jung *et al.*, 2005; Cui *et al.*, 2016), others suggested that STAT3 is involved in the stabilization of HIF1 $\alpha$  protein (Xu *et al.*, 2005). To better elucidate this intricate mechanism of regulation, we decided to analyze the crosstalk between STAT3 and HIF1 $\alpha$  using both *in vivo* and *in vitro* physiological models. RNAseq experiments performed on mouse ESCs allowed us to determine that a large part (about 30%) of genes induced by hypoxia and Hif1 $\alpha$  require a functional STAT3. Of note, with this experiment we provide the list of genes that are regulated in concert by STAT3 and HIF1 $\alpha$ , demonstrating that the hypoxia-triggered control of glycolysis and angiogenesis depends on STAT3.

Taking advantage of the Stat3 zebrafish reporter line characterized in Peron *et al.* (2020), we demonstrated that Stat3-positive cells in the zebrafish intestine have a strong Hif1 $\alpha$  signature, hence, we decided to test whether hypoxia-dependent activities rely on Stat3. Drugs inhibiting Stat3 signaling pathway established a severe unresponsiveness of zebrafish larvae to hypoxia and pseudohypoxia, underlying a pivotal role for Stat3 in the normal induction of hypoxia-related transcriptional activity. This result was additionally confirmed

by the defective responsiveness to hypoxia of *stat3* mutant zebrafish larvae: many hypoxia- and Hif1 $\alpha$ -dependent processes like angiogenesis and macrophage mobilization from AGM are significantly affected by *stat3* genetic ablation, confirming our hypothesis that Stat3 is essential for the correct activation of hypoxic adaptation. Notably, we could show both in zebrafish and mouse ESCs that STAT3 is not involved in the transcription of *Hif1 $\alpha$*  gene, nor in the stabilization of HIF1 $\alpha$  protein and that HIF1 $\alpha$  localizes in the nucleus even when *Stat3* is not expressed. Remarkably, we demonstrated that STAT3 physically interacts with HIF1 $\alpha$  and that their interaction is specifically localized in the nucleus. These results support the hypotheses that STAT3 enhances HIF1 $\alpha$  transcriptional activities by regulating its interaction with either HIF1 $\beta$ , the Hypoxia Responsive Elements on target genes or the basal transcriptional machinery. Finally, it is worth mentioning that STAT3-dependent control of HIF1 $\alpha$  transcriptional activity affects specifically genes involved in angiogenesis (*Vegfa*) and metabolism (*Hk1*, *Hk2*, *Pfkfb*) and this result was observed both in mouse ESCs (Fig 1) and in zebrafish (Fig. 4,5). The regulation of these processes, representing two of the most important biological functions regulated by HIF1 $\alpha$ , highlights the pivotal role of STAT3 in the proper response to low oxygen tensions and shows that the connection between STAT3 and HIF1 $\alpha$  is much stronger than it was previously thought. These findings, together with the observation by Russell et al. (2011) that VHL promotes ubiquitin-mediated destruction of JAK2, and the fact that JAK/STAT3 and HIF/VHL play a role in many diseases, call for a deeper analysis of their crosstalk and the implications this crosstalk might have from a therapeutic point of view..



## MATERIAL AND METHODS

### **Animals husbandry and zebrafish lines**

Animals were staged and fed as described by Kimmel *et al.* (1995) and maintained in a large-scale aquaria system.

Embryos were obtained after natural mating, raised in Petri dishes containing fish water (50x: 5 g NaHCO<sub>3</sub>, 39.25 g CaSO<sub>4</sub>, 25 g Instant Ocean for 1 l) and kept in a 12:12 light dark cycle at 28° C. All experimental procedures complied with European Legislation for the Protection of Animals used for Scientific Purposes (Directive 2010/63/EU).

*stat3<sup>ia23</sup>* mutant line (Peron *et al.*, 2020) is genotyped by PCR amplification and 3% agarose gel migration. The *Tg(7xStat3-Hsv.Ul23:EGFP)<sup>ia28</sup>* line, the *Tg(4xHRE-TATA:mCherry,cmlc2:EGFP)<sup>ia22</sup>* line, the *Tg(fli1:EGFP)<sup>y1</sup>*, the *Tg(gata1:dsRed)<sup>sd2</sup>* line and the *Tg(LysC:dsRed)<sup>nz50</sup>* lines have been respectively characterized by Peron *et al.* (2020), Vettori *et al.* (2017), by Lawson and Weinstein (2002), Galloway *et al.* (2005) and by Hall *et al.* (2007). All animal experiments were performed under the permission of the ethical committee of the University of Padova and the Italian Ministero della Salute (23/2015-PR).

### **Mouse ESCs culture and treatments**

ESCs were grown and transfected as described in Carbognin *et al.* (2016). Hypoxia treatments were performed for 24 hours with 1% oxygen tensions. 0.1 mM CoCl<sub>2</sub> was added to cell culture media for 24 hours.

### **Proximity ligation assay**

Mouse ESCs were fixed for 10 minutes in 4% formaldehyde at -20°C, washed in TBS and permeabilized for 10 minutes with TBST + 0.5% Triton X-100 at room temperature. PLA was

performed following the Duolink® protocol: cells were covered with Duolink® blocking solution and incubated for 60 minutes at 37°C in humidity chamber; primary antibodies anti-STAT3 mouse monoclonal (Cell Signaling, 9139) (1:100) and anti-HIF1α rabbit monoclonal (Novus Biologicals, NB100-499) (1:100) were dissolved in Duolink® antibody diluent and samples were incubated overnight at 4°C. Primary antibodies solution was removed and samples were washed 2 times for 5 minutes with washing buffer A (prepared following manufacturer's instructions) and subsequently incubated for 1 hour at 37°C with Duolink® PLA probe mix. After 2 washes with washing buffer A for 5 minutes each, samples were incubated at 30 minutes at 37°C with Duolink® ligation mix. Samples were washed 2 times for 2 minutes with washing buffer A and, subsequently, incubated for 100 minutes at 37°C with Duolink® amplification mix. After three washes with washing buffer B (prepared following manufacturer's instructions), samples were ready for imaging.

### ***Drug and hypoxic treatments***

We used the following chemical compounds: AG490 (T3434, Sigma); DMOG (D3695, Sigma), Dex (D1756, Sigma), CoCl<sub>2</sub> (232696, Sigma). Dex was diluted in ethanol and stored at 4° C, while the other compounds were diluted in DMSO and stored in small aliquots at -20° C. 2 mM 1-phenyl-2-thiourea (PTU) was used to inhibit pigmentation. Larvae were treated from 3 dpf to 6 dpf with 50 μM AG490, 50 μM DMOG, 10 μM Dex; from 5 dpf to 6 dpf with 0.5 mM CoCl<sub>2</sub>. 5% oxygen tension was maintained using ProCO<sub>2</sub> (BioSpherix) device and larvae were incubated with low oxygen tension from 3 dpf to 6 dpf.

### ***mRNA isolation and quantitative real time reverse transcription PCR (qRT-PCR)***

Total RNAs were extracted from pools of 20 larvae at 3, 4, 5 and 6 dpf with TRIzol reagent (Thermo Fisher Scientific, 15596018) and incubated at 37° C for 30 minutes with RQ1 RNase-Free DNase (Promega, M6101). cDNA synthesis was performed using random primers (Promega, C1181) and M-MLV Reverse Transcriptase RNase H (Solis BioDyne, 06-21-010000) according to the manufacturer's protocol. qPCRs were performed in triplicate with CybrGreen method by means of Rotor-gene Q (Qiagen) and the 5x HOT FIREPol EvaGreen qPCR Mix Plus (Solis BioDyne, 08-36-00001) and *zgapdh* and *mActnb* were used as internal standard in each sample. The amplification protocol consists of 95° C for 14 minutes followed by 45 cycles at 95° C for 20 seconds, 60° C for 20 seconds and 72° C for 25 seconds. Threshold cycles (Ct) and melting curves were generated automatically by Rotor-Gene Q series software and results were obtained with the method described in Livak and Schmittgen (2001). Sequences of genes of interest primers were designed with Primer3 software (Untergasser *et al.*, 2012) (<http://bioinfo.ut.ee/primer3-0.4.0/input.htm>) and are listed in supplementary material Table 1.

### ***Protein extraction and western blotting***

Total protein extracts were obtained by homogenization of pools of 20 6-dpf larvae in ice cold RIPA buffer (ThermoFisher, 89900) and Complete EDTA-free protease inhibitor cocktail (Sigma, 11873580001). For western blot analysis 40 µg of protein extracts were loaded per well on Bolt 4-12% Bis-Tris Plus Gels (ThermoFisher, NW04120BOX) and blotted on PVDF immobilon-p membranes (Millipore, IPFL00010). Dried membranes were then washed with PBS (Sigma, P4417) with 0.1% (w/v) Tween20 and incubated overnight with primary antibodies at 4° C: anti-HIF1α (1:500, MA1-16504 Invitrogen); anti-STAT3 (1:1000,

9139S Cell Singaling); anti- $\beta$ Actin (1:5000, MA1-744 ThermoFisher). Secondary anti-Rabbit and anti-Mouse HRP-conjugated antibodies (170-6515 BIORAD, and 170-6516 BIORAD, respectively) were incubated for 1 hour at room temperature and protein bands detected by chemiluminescence on an Alliance MINI HD 9 Blot Imaging System. Quantification of the signal was performed with ImageJ.

### ***Imaging***

For *in vivo* imaging, transgenic larvae were anesthetized with 0.04% tricaine, embedded in 1% low-melting agarose and mounted on a depression slide. Nikon C2 confocal system was used to acquire images from *Tg(Fli1:EGFP)<sup>y1</sup>* transgenic larvae. *Tg(4xHRE-TATA:mCherry,cmlc2:EGFP)<sup>ia22</sup>*, *Tg(LysC:dsRed)<sup>nz50</sup>* and *Tg(gata1:dsRed)<sup>sd2</sup>* transgenic larvae were mounted in 1% low-melting agarose and observed with a Leica M165 FC microscope equipped with a Nikon DS-Fi2 digital camera. All images were analysed with Fiji (ImageJ) software and fluorescence integrated density was calculated setting a standard threshold on non-fluorescent samples.

### ***Fluorescence-Activated Cell Sorting (FACS)***

Adult intestines of *Tg(7xStat3-Hsv.Ul23:EGFP)<sup>ia28</sup>* fish were dissected and treated as reported by Peron *et al.* (2020). Cells from two intestines were pooled together for three independent biological replicas.

### ***In vitro mRNA synthesis and mRNA microinjection***

The DA *hif1ab* mRNA was obtained from pCS2-*hif1abDA* vector that Dr. Phil Elks kindly sent us. mRNAs were *in vitro* transcribed using the mMACHINE<sup>®</sup> SP6 Transcription

Kit (Thermo Fisher Scientific) and purified using the RNA Clean and Concentrator kit (Zymo Research). A mix containing 50ng/ $\mu$ M mRNA Danieau injection Buffer and Phenol Red injection dye, was injected into 1-cell stage embryos. *hif1aa* and *hif1ab* morpholinos, that Dr. Nana Fukuda kindly sent us, were injected together in 1-cell stage embryos as described in Gerri *et al.*, 2017.

### ***RNA-sequencing***

Quant Seq 3' mRNA-seq Library Prep kit (Lexogen) is used for library construction. Library generation is initiated by oligodT priming. The primer already contains Illumina-compatible linker sequences. After first strand synthesis the RNA is removed and second strand synthesis is initiated by random priming and a DNA polymerase. The random primer also contains Illumina-compatible linker sequences. Second strand synthesis is followed by a magnetic bead-based purification step. The library is then amplified, introducing the sequences required for cluster generation. External barcodes are introduced during the PCR amplification step. Library quantification is performed by fluorometer (Qubit) and bioanalyzer (Agilent). QuantSeq Forward contains the Read 1 linker sequence in the second strand synthesis primer, hence NGS reads are generated towards the poly(A) tail and directly correspond to the mRNA sequence. QuantSeq FWD maintains strand-specificity and allows mapping of reads to their corresponding strand on the genome, enabling the discovery and quantification of antisense transcripts and overlapping genes. Sequencing is performed on NextSeq500 ILLUMINA instrument to produce 5 million of reads (75bp SE) for sample. The reads were trimmed using BBDuk (BBMap v. 37.62), with parameters indicated in the Lexogen data analysis protocol. After trimming, reads were aligned to the mouse genome (GRCm38.p6) using STAR (v. 2.7.6a). The gene expression levels were quantified using

featureCounts (v. 2.0.1). Genes were sorted removing those that had a total number of counts below 10 in at least 4 samples out of 16. After applying this filter, we identified 12,432 expressed genes that were considered for further analyses. All RNA-seq analyses were carried out in R environment (v. 4.0.0) with Bioconductor (v. 3.7). We computed differential expression analysis using the DESeq2 R package (v. 1.28.1) (Love *et al.*, 2014 Genome Biol). DESeq2 performs the estimation of size factors, the estimation of dispersion for each gene and fits a generalized linear model. Transcripts with absolute value of  $\log_2[\text{FC}] > 0.75$  and an adjusted p-value  $< 0.01$  (Benjamini–Hochberg adjustment) were considered significant and defined as differentially expressed for the comparison in the analysis. Heatmaps were made using counts-per-million (CPM) values with the pheatmap function from the pheatmap R package (v.1.0.12; distance = ‘correlation’, scale = ‘row’) on differentially expressed genes or selected markers. Volcano plots were computed with  $\log_2[\text{FC}]$  and  $-\log_{10}[\text{q-value}]$  from DESeq2 differential expression analysis output using the ggscatter function from the ggpubr R package (v. 0.4.0).

### ***Statistical analysis***

Statistical analysis was performed using Graph Pad Prism software V6.0. Data are presented as the means  $\pm$  SEM. Comparison between different groups of samples was performed by Student’s t-test with a confidence interval of 95%. The p-values are indicated with asterisks: \* $p < 0.05$ ; \*\* $p < 0.01$ ; \*\*\* $p < 0.001$ ; \*\*\*\* $p < 0.0001$ .

## References

- 1. Almiron Bonnin D.A., Havrda M.C., Lee M.C., Liu H., Zhang Z., Nguyen L.N., Harrington L.X., Hassanpour S., Cheng C., Israel M.A.** (2018) Secretion-mediated STAT3 activation promotes self-renewal of glioma stem-like cells during hypoxia. *Oncogene*. **37(8)**:1107-1118.
- 2. Avalle L., Camporeale A., Campieri A., Poli V.** (2017) STAT3 in cancer: a double edged sword. *Cytokine*. **98**: 42-50
- 3. Betto R.M., Diamante L., Perrera V., Audano M., Rapelli S., Lauria A., Incarnato D., Arboit M., Pedretti S., Guerineau V. et al.** (2021) Metabolic control of DNA methylation in naive pluripotent cells. *Nat. Genet.* **53**: 215-229.
- 4. Bresciani E., Confalonieri S., Cermenati S., Cimbro S., Foglia E., Beltrame M., Di Fiore P.P., Cotelli F.** (2010) Zebrafish numb and numblake are involved in primitive erythrocyte differentiation. *PLoS One*. **5(12)**: e14296.
- 5. Carbognin E., Betto R.M., Soriano M.E., Smith A.G., Martello G.** (2016) Stat3 promotes mitochondrial transcription and oxidative respiration during maintenance and induction of naive pluripotency. *EMBO J.* **35(6)**: 618–634.
- 6. Carlsson R., Özen I., Barbariga M., Gaceb A., Roth M., Paul G.** (2018) STAT3 precedes HIF1 $\alpha$  transcriptional responses to oxygen and oxygen and glucose deprivation in human brain pericytes. *PLoS One*. **13(3)**: e0194146.
- 7. Cui Y., Li Y.Y., Li J., Zhang H.Y., Wang F., Bai X., Li S.S.** (2016) STAT3 regulates hypoxia-induced epithelial mesenchymal transition in oesophageal squamous cell cancer. *Oncol Rep.* **36(1)**: 108-16.

8. **Dunn S.J., Martello G., Yordanov B., Emmott S., Smith A.G.** (2014) Defining an essential transcription factor program for naïve pluripotency. *Science*. **344**: 1156–1160
9. **Elks P.M., Brizee S., van der Vaart M., Walmsley S.R., van Eeden F.J., Renshaw S.A., Meijer A.H.** (2013) Hypoxia inducible factor signaling modulates susceptibility to mycobacterial infection via a nitric oxide dependent mechanism. *PLoS Pathog.* **9(12)**: e1003789.
10. **Elks P.M., Renshaw S.A., Meijer A.H., Walmsley S.R., Van Eeden F.J.** (2015) Exploring the HIFs, buts and maybes of hypoxia signalling in disease: lesson from zebrafish models. *Dis Model Mech.* **8(11)**: 1349-1360.
11. **Elks P.M., van Eeden F.J., Dixon G., Wang X., Reyes-Aldasoro C.C., Ingham P.W., Whyte M.K., Walmsley S.R., Renshaw S.A.** (2011) Activation of hypoxia-inducible factor-1 $\alpha$  (Hif-1 $\alpha$ ) delays inflammation resolution by reducing neutrophil apoptosis and reverse migration in a zebrafish inflammation model. *Blood*. **118(3)**: 712-22.
12. **Eyries M., Siegfried G., Ciumas M., Montagne K., Agrapart M., Lebrin F., Soubrier F.** (2008) Hypoxia-induced Apelin expression regulates endothelial cell proliferation and regenerative angiogenesis. *Circ. Res.* **103**: 432-440.
13. **Fraisl P., Mazzone M., Schmidt T., Carmeliet C.** (2009) Regulation of angiogenesis by oxygen and metabolism. *Dev Cell.* **16(2)**: 167-179.
14. **Galloway J.L., Wingert R.A., Thisse C., Thisse B., Zon L.I.** (2005) Loss of Gata1 but not Gata2 converts erythropoiesis to myelopoiesis in zebrafish embryos. *Dev Cell.* **8(1)**: 109-116.



- 15. Gao W., McCormick J., Connolly M., Balogh E., Veale D.J., Fearon U.** (2015) Hypoxia and STAT3 signalling interactions regulate pro-inflammatory pathways in rheumatoid arthritis. *Ann Rheum Dis.* **74(6)**: 1275–1283.
- 16. Gerri C., Marass M., Rossi A., Stainier D.Y.R.** (2018) Hif-1 $\alpha$  and Hif-2 $\alpha$  regulate hemogenic endothelium and hematopoietic stem cell formation in zebrafish. *Blood.* **131(9)**: 963-973.
- 17. Gerri C., Marìn-Juez R., Marass M., Marks A., Maischein H., Stainier D.Y.R.** (2017) Hif1 $\alpha$  regulates macrophage-endothelial interactions during blood vessel development in zebrafish. *Nat Commun.* **8**: 15492.
- 18. Gray M.J., Zhang J., Ellis L.M., Semenza G.L., Evans D.B., Watowich S.S., Gallick G.E.** (2005) HIF-1 $\alpha$ , STAT3, CBP/p300 and Ref-1/APE are components of a transcriptional complex that regulates Src-dependent hypoxia-induced expression of VEGF in pancreatic and prostate carcinomas. *Oncogene.* **24(19)**: 3110-20.
- 19. Grillo M., Palmer C., Holmes N., Sang F., Larner A.C., Bhosale R., Shaw P.E.** (2020) Stat3 oxidation-dependent regulation of gene expression impacts on developmental processes and involves cooperation with Hif-1 $\alpha$ . *PLoS One.* **15(12)**: e0244255.
- 20. Haase V.H.** (2010) Hypoxic regulation of erythropoiesis and iron metabolism. *Am J Physiol Renal Physiol.* **299(1)**: F1-13.
- 21. Haase V.H.** 2013 Regulation of erythropoiesis by hypoxia-inducible factors. *Blood Rev.* **27(1)**: 41-53.
- 22. Hall C., Flores M.V., Storm T., Crosier K., Crosier P.** (2007) The zebrafish lysozyme C promoter drives myeloid-specific expression in transgenic fish. *BMC Dev Biol.* **7**: 42.

- 23. Hill A.J., Heiden T.C.K., Heideman W., Peterson R.E.** (2009) Potential roles of Arnt2 in zebrafish larval development. *Zebrafish*. **6(1)**: 79-91.
- 24. Huang G., Yan H., Ye S., Tong C., Ying Q.L.** (2014) STAT3 phosphorylation at tyrosine 705 and serine 727 differentially regulates mouse ESC fates. *Stem Cells*. **32(5)**: 1149-60.
- 25. Jeong C.H., Lee H.J., Cha J.H., Kim J.H., Kim K.R., Kim J.H., Yoon D.K., Kim K.W.** (2007) Hypoxia-inducible factor-1 alpha inhibits self-renewal of mouse embryonic stem cells in Vitro via negative regulation of the leukemia inhibitory factor-STAT3 pathway. *J Biol Chem*. **282(18)**:13672-9.
- 26. Jung J.E., Lee H.G., Cho I.H., Chung D.H., Yoon S.H., Yang Y.M., Lee J.W., Choi S., Park J.W., Ye S.K., Chung M.H.** (2005) STAT3 is a potential modulator of HIF-1-mediated VEGF expression in human renal carcinoma cells. *FASEB J*. **19(10)**: 1296-8.
- 27. Kaelin W.G. Jr.** (2017) The VHL Tumor Suppressor Gene: Insights into Oxygen Sensing and Cancer. *Trans Am Clin Climatol Assoc*. **128**: 298-307.
- 28. Katsuda T., Teratani T., Chowdhury M.M., Ochiya T., Sakai Y.** (2013) Hypoxia efficiently induces differentiation of mouse embryonic stem cells into endodermal and hepatic progenitor cells. *Biochem. Eng. J*. **74**: 95-101.
- 29. Ke X., Chen C., Song Y., Cai Q., Li J., Tang Y., Han X., Qu W., Chen A., Wang H., Xu G., Liu D.** (2019) Hypoxia modifies the polarization of macrophages and their inflammatory microenvironment, and inhibits malignant behavior in cancer cells. *Oncol Lett*. **18(6)**: 5871-5878.
- 30. Kietzmann T.** (2020) Hypoxia-inducible erythropoietin expression: details matter. *Haematologica*. **105(12)**: 2704-2706.

- 31. Kimmel C.B., Ballard W.W., Kimmel S.R., Ullmann B., Schilling T.F.** (1995) Stages of embryonic development of the zebrafish. *Dev Dyn.* **203(3)**: 253-310.
- 32. Lenard A., Alghisi E., Daff H., Donzelli M., McGinnis C., Lengerke C.** (2016) Using zebrafish to model erythroid lineage toxicity and regeneration. *Haematologica.* **101(5)** :e164-7.
- 33. Lawson N.D., Weinstein B.M.** (2002) In vivo imaging of embryonic vascular development using transgenic zebrafish. *Dev Biol.* **248(2)**: 307-18.
- 34. Lewis A., Elks P.M.** (2019) Hypoxia Induces Macrophage *tnfa* Expression via Cyclooxygenase and Prostaglandin E2 *in vivo*. *Front Immunol.* **10**: 2321.
- 35. Lewis J.S., Lee J.A., Underwood J.C., Harris A.L., Lewis C.E.** (1999) Macrophage responses to hypoxia: relevance to disease mechanisms. *J Leukoc Biol.* **66(6)**: 889-900.
- 36. Li X., Lu Y.C., Dai K., Torregroza I., Hla T., Evans T.** (2014) Elavl1a regulates zebrafish erythropoiesis via posttranscriptional control of *gata1*. *Blood.* **23(9)**: 1384-92.
- 37. Livak K.J., Schmittgen T.D.** (2001) Analysis of relative gene expression data using real-time quantitative PCR and the 2<sup>(-Delta Delta C(T))</sup> Method. *Methods.* **25(4)**: 402-8.
- 38. Liu Y., Sepich D.S., Solnica-Krezel L.** (2017) Stat3/Cdc25a-dependent cell proliferation promotes embryonic axis extension during zebrafish gastrulation. *PLoS Genet.* **13(2)**: e1006564.
- 39. Longchamp A., Mirabella T., Arduini A., MacArthur M.R., Das A., Treviño-Villarreal J.H., Hine C., Ben-Sahra I., Knudsen N.H., Brace L.E. et al.** (2018) Amino

Acid Restriction Triggers Angiogenesis via GCN2/ATF4 Regulation of VEGF and H<sub>2</sub>S Production. *Cell*. **173(1)**: 117-129.

**40. Lyons S.E., Lawson N.D., Lei L., Bennett P.E., Weinstein B.M., Liu P.P.** (2002) A nonsense mutation in zebrafish *gata1* causes the bloodless phenotype in vlad tepes. *Proc Natl Acad Sci U S A*. **99(8)**: 5454-9.

**41. Marchi D., Kirankumar S., Markham E., Li N., Storbeck K., Krone N., Cunliffe V.T., van Eeden F.J.M.** (2020) Bidirectional crosstalk between Hypoxia-Inducible Factor and glucocorticoid signalling in zebrafish larvae. *PLOS Genetics*. **16(5)**: e1008757.

**42. Martello G., Bertone P., Smith A.** (2013) Identification of the missing pluripotency mediator downstream of leukaemia inhibitory factor. *EMBO J*. **2(19)**: 2561-74.

**43. Masson N. and Ratcliffe P.J.** (2003) HIF prolyl and asparaginyl hydroxylases in the biological response to intracellular O<sub>2</sub> levels. *Journal of Cell Science*. **116**: 3041-3049.

**44. Matsuda T., Nakamura T., Nakao K., Arai T., Katsuki M., Heike T., Yokota T.** (1999) STAT3 activation is sufficient to maintain an undifferentiated state of mouse embryonic stem cells. *EMBO J*. **18(15)**: 4261-9.

**45. Minamishima Y.A., Moslehi J., Padera R.F., Bronson R.T., Liao R., Kaelin W.G. Jr.** (2009) A feedback loop involving the Phd3 prolyl hydroxylase tunes the mammalian hypoxic response in vivo. *Mol Cell Biol*. **29(21)**: 5729-41.

**46. Mole D.R., Schlemminger I., McNeill L.A., Hewitson K.S., Pugh C.W., Ratcliffe P.J., Schofield C.J.** (2003) 2-Oxoglutarate analogue inhibitors of hif prolyl hydroxylase. *Bioorganic & Medicinal Chemistry Letters*. **13(16)**: 2677-2680.

**47. Munos-Sanchez J., Chanez-Cardenas M.E.** (2018) The use of cobalt chloride as a chemical hypoxia model. *J App Toxicol*. **39(4)**: 556-570.

- 48. Oh M.K., Park H.J., Kim N.H., Park S.J., Park I.Y., Kim I.S.** (2011) Hypoxia-inducible factor-1alpha enhances haptoglobin gene expression by improving binding of STAT3 to the promoter. *J Biol Chem.* **286(11)**: 8857-65.
- 49. Park J.S., Lee J., Lim M.A., Kim E.K., Kim S.M., Ryu J.G., Lee J.H., Kwok S.K., Park K.S., Kim H.Y., et al.** (2014) JAK2-STAT3 blockade by AG490 suppresses autoimmune arthritis in mice via reciprocal regulation of regulatory T Cells and Th17 cells. *J Immunol.* **192(9)**: 4417-24.
- 50. Pawlus M.R., Wang L., Hu C.J.** (2014) STAT3 and HIF1 $\alpha$  cooperatively activate HIF1 target genes in MDA-MB-231 and RCC4 cells. *Oncogene.* **33(13)**: 1670-9.
- 51. Peron M., Dinarello A., Meneghetti G., Martorano L., Betto R.M., Facchinello N., Tesoriere A., Tiso N., Martello G., Argenton F.** (2021) Y705 and S727 are required for the mitochondrial import and transcriptional activities of STAT3, and for regulation of stem cell proliferation. *Development.* **148(17)**: dev199477.
- 52. Peron M., Dinarello A., Meneghetti G., Martorano L., Facchinello N., Vettori A., Licciardello G., Tiso N., Argenton F.** (2020) The stem-like STAT3-responsive cells of zebrafish intestine are WNT/ $\beta$ -catenin dependent. *Development.* **147(12)**: dev188987.
- 53. Pimton P., Lecht S., Stabler C.T., Johannes G., Schulman E.S., Lelkes P.I.** (2015) Hypoxia enhances differentiation of mouse embryonic stem cells into definitive endoderm and distal lung cells. *Stem Cells Dev.* **24(5)**: 663-676.
- 54. Quintana A.M., Picchione F., Klein Geltink R.I., Taylor M.R., Grosveld G.C.** (2014) Zebrafish ETV7 regulates red blood cell development through the cholesterol synthesis pathway. *Dis Model Mech.* **7(2)**: 265-70.

- 55. Rey S., Semenza G.L.** (2010) Hypoxia-inducible factor-1-dependent mechanisms of vascularization and vascular remodelling. *Cardiovasc Res.* **86(2)**:236-42.
- 56. Russell, R. C., Sufan, R. I., Zhou, B., Heir, P., Bunda, S., Sybingco, S. S., Greer, S. N., Roche, O., Heathcote, S. A., Chow, V. W., Boba, L. M., Richmond, T. D., Hickey, M. M., Barber, D. L., Cheresch, D. A., Simon, M. C., Irwin, M. S., Kim, W. Y., & Ohh, M.** (2011). Loss of JAK2 regulation via a heterodimeric VHL-SOCS1 E3 ubiquitin ligase underlies Chuvash polycythemia. *Nature medicine*, **17(7)**, 845–853.
- 57. Sadiku P., Walmsley S.R.** (2019) Hypoxia and the regulation of myeloid cell metabolic imprinting: consequences for the inflammatory response. *EMBO Rep.* **20(5)**: e47388.
- 58. Santhakumar K., Judson E.C., Elks P.M., McKee S., Elworthy S., van Rooijen E., Walmsley S.S., Renshaw S.A., Cross S.S., van Eeden F.J.** (2012) A zebrafish model to study and therapeutically manipulate hypoxia signaling in tumorigenesis. *Cancer Res.* **72(16)**: 4017-27.
- 59. Semenza G.L.** (2001) HIF-1 and mechanisms of hypoxia sensing. *Curr Opin Cell Biol.* **13(2)**:167-71.
- 60. Semenza G.L.** (2012) Hypoxia-inducible factors in physiology and medicine. *Cell.* **148(3)**: 399-408.
- 61. Solak Y., Cetiner M., Siroopol D., Tarim K., Afsar B., Covic A., Kanbay M.** (2016) Novel Masters of Erythropoiesis: Hypoxia Inducible Factors and Recent Advances in Anemia of Renal Disease. *Blood Purif.* **42(2)**: 160-7.
- 62. Tengesdal I.W., Dinarello A., Powers N.E., Burchill M.A., Joosten L.A.B., Marchetti C., Dinarello C.A.** (2021) Tumor NLRP3-derived IL-1 $\beta$  drives the IL-6/STAT3 axis

resulting in sustained MDSC-mediated immunosuppression. *Front Immunol.* **12**: 661323.

- 63. Tesoriere A., Dinarello A., Argenton F.** (2021) Role of post translational modifications in STAT3 biological activities and function. *Biomedicines.* **9(8)**: 956.
- 64. Triantafyllou A., Liakos P., Tsakalof A., Georgatsou E., Simos G., Bonau S.** (2006) Cobalt induces hypoxia-inducible factor-1alpha (HIF-1alpha) in HeLa cells by an iron-independent but ROS-, PI-3K- and MAPK-dependent mechanism. *Free Radic Res.* **40(8)**: 847-856.
- 65. Untergasser A., Cutcutache I., Koressaar T., Ye J., Faircloth B.C., Remm M., Rozen S.G.** (2012) Primer3--new capabilities and interfaces. *Nucleic Acids Res.* **40(15)**:e115.
- 66. Vettori A., Greenald D., Wilson G.K., Peron M., Facchinello N., Markham E., Sinnakaruppan M., Matthews L.C., McKeating J.A., Argenton F. et al.** (2017) Glucocorticoids promote Von Hippel Lindau degradation and Hif-1 $\alpha$  stabilization. *PNAS.* **114**: 9948-9953.
- 67. Walmsley S.R., Chilvers E.R., Thompson A.A., Vaughan K., Marriott H.M., Parker L.C., Shaw G., Parmar S., Schneider M., Sabroe I., Dockrell D.H. et al.** (2011) Prolyl hydroxylase 3 (PHD3) is essential for hypoxic regulation of neutrophilic inflammation in humans and mice. *J Clin Invest.* **121(3)**: 1053-63.
- 68. Wang L., Liu X., Wang H., Yuan H., Chen S., Chen Z., de The H., Zhou J., Zhu J.** (2018) RNF4 regulates zebrafish granulopoiesis through the DNMT1-C/EBP $\alpha$  axis. *FASEB J.* **(9)**:4930-4940.
- 69. Wray J., Kalkan T., Smith A.G.** (2010) The ground state of pluripotency. *Biochem Soc Trans.* **38(4)**: 1027-32.

- 70. Xu Q., Briggs J., Park S., Niu G., Kortylewski M., Zhang S., Gritsko T., Turkson J., Kay H., Semenza G.L. et al.** (2005) Targeting Stat3 blocks both HIF-1 and VEGF expression induced by multiple oncogenic growth signaling pathways. *Oncogene*. **24(36):**5552-60.
- 71. Ying Q.L., Wray J., Nichols J., Battle-Morera L., Doble B., Woodgett J., Cohen P., Smith A.** (2008) The ground state of embryonic stem cell self-renewal. *Nature*. **453:** 519–523.
- 72. Zhang L., Shen G., Liu X., Wang F., Zhao Y., Zhang J.** (2012) Hypoxia inducible factor 1-mediated human GATA1 induction promotes erythroid differentiation under hypoxic conditions. *J Cell Mol Med*. **16(8):** 1889-1899.
- 73. Zhou W., Choi M., Margineantu D., Margaretha L., Hesson J., Cavanaugh C., Blau C.A., Horwitz M.S., Hockenbery D., Ware C., Ruohola-Baker H.** (2012) HIF1 $\alpha$  induced switch from bivalent to exclusively glycolytic metabolism during ESC-to-EpiSC/hESC transition. *EMBO J*. **31:** 2103-2116.



## **ACKNOWLEDGMENTS**

We are thankful to the personnel at the Zebrafish Centre of the University of Padova (Dr Luigi Pivotti, Mrs. Shkendy Iljazi, Dr Martina Milanetto). We are grateful to Valentina Tonelotto, Davide Volpato, Lorenzo Badenetti, Giada Vanni, Lorenzo Lupi, Saverio Fortunato and Olga Perrotti for their technical support. The study has been supported by the AIRC project IG-2017-19928 to F.A. G.M.'s Laboratory is supported by grants from the Giovanni Armenise-Harvard Foundation, the Telethon Foundation and an ERC Starting Grant (MetEpiStem).

## **Authors' contributions**

AD acquisition, analysis, interpretation of data, drafting the work, writing-original draft; RMB acquisition, analysis, interpretation of data, drafting the work, writing-review & editing; CC acquisition, analysis, interpretation of data, writing-review & editing; LD acquisition, analysis, interpretation of data; GMe acquisition, analysis, interpretation of data; MP acquisition, analysis; AT acquisition, analysis; CL acquisition, analysis; NT organization of the work; GMa interpretation of data, drafting the work, writing-review & editing; FA interpretation of data, drafting the work, writing-review & editing.

## Supplementary figures

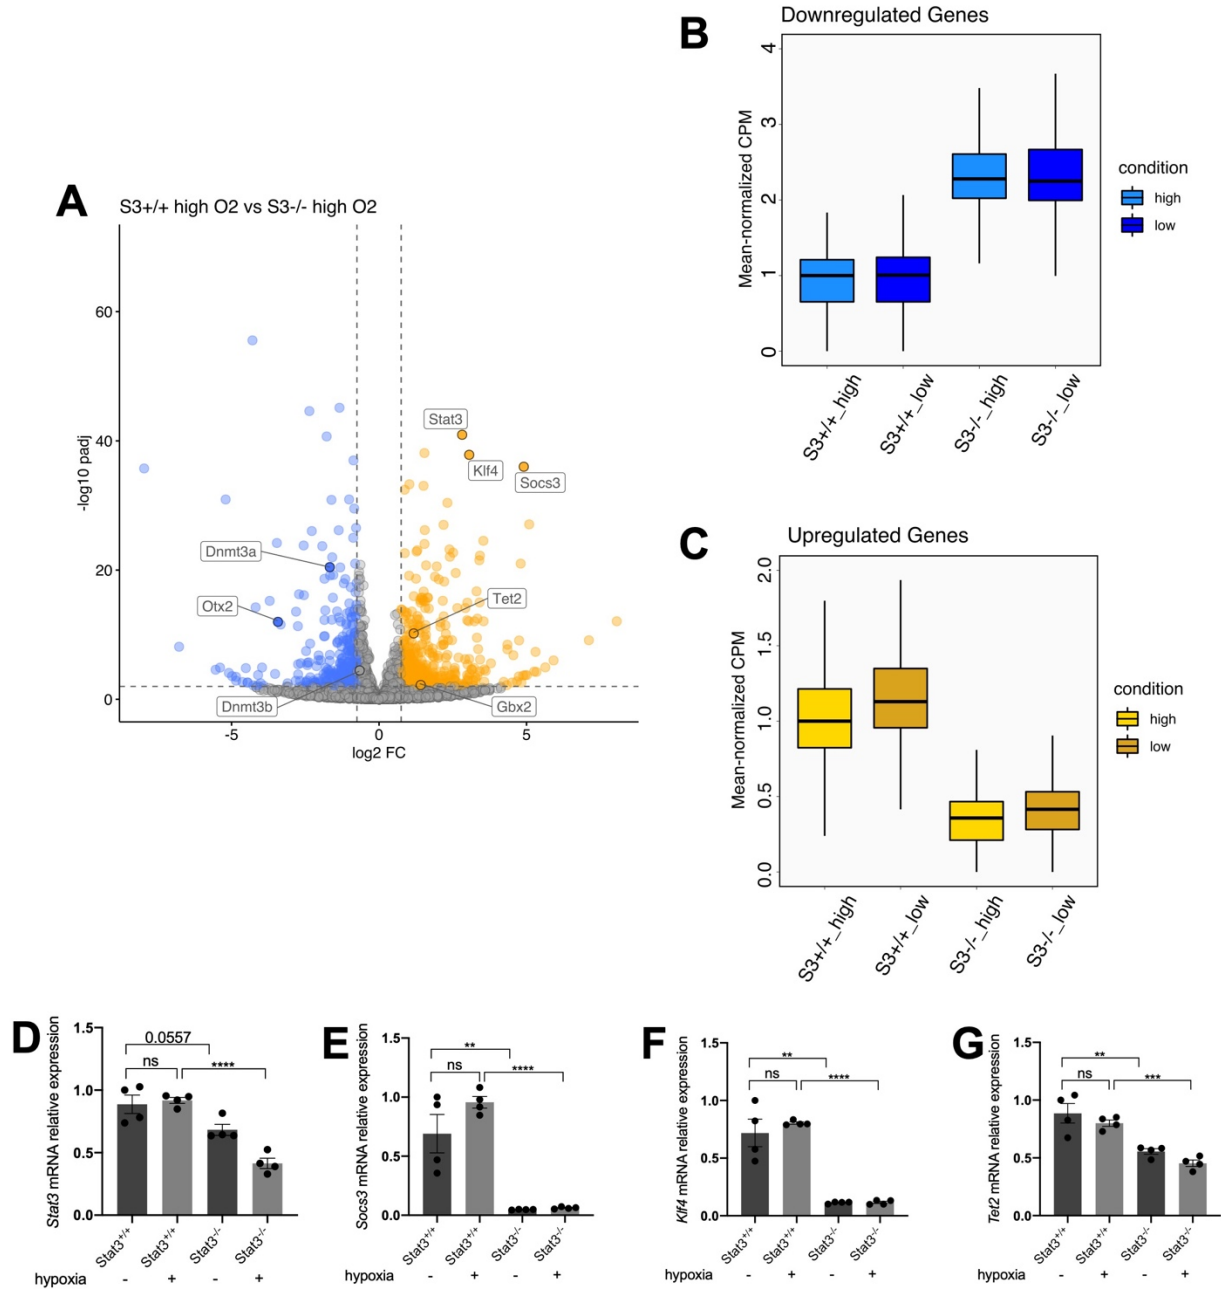

Fig. S1: **Transcriptome analysis by RNA-seq.** A: Genes that were differentially expressed ( $\log_2[\text{fold change (FC)}] > +0.75$  or  $< -0.75$ ;  $q\text{-value} < 0.01$ , Benjamini–Hochberg adjustment, as indicated by dashed lines) between *Stat3*<sup>+/+</sup> and *Stat3*<sup>-/-</sup> cells;  $n = 4$  biological replicates. B: Expression levels of genes that were downregulated in *Stat3*<sup>+/+</sup> relative to *Stat3*<sup>-/-</sup> cells.

C: Expression levels of genes that were upregulated in *Stat3*<sup>+/+</sup> relative to *Stat3*<sup>-/-</sup> cells. Each boxplot shows the 1st, 2nd and 3rd quartiles; the whiskers show the minimum and maximum values. C: *Stat3* expression in *Stat3*<sup>+/+</sup> and *Stat3*<sup>-/-</sup> cells incubated either in normoxia and hypoxia. D: *Socs3* expression in *Stat3*<sup>+/+</sup> and *Stat3*<sup>-/-</sup> cells incubated either in normoxia and hypoxia. E: *Klf4* expression in *Stat3*<sup>+/+</sup> and *Stat3*<sup>-/-</sup> cells incubated either in normoxia and hypoxia. F: *Tet2* expression in *Stat3*<sup>+/+</sup> and *Stat3*<sup>-/-</sup> cells incubated either in normoxia and hypoxia. Mean=SEM. \*\*p<0.01, \*\*\*p<0.001, ns=not significant.

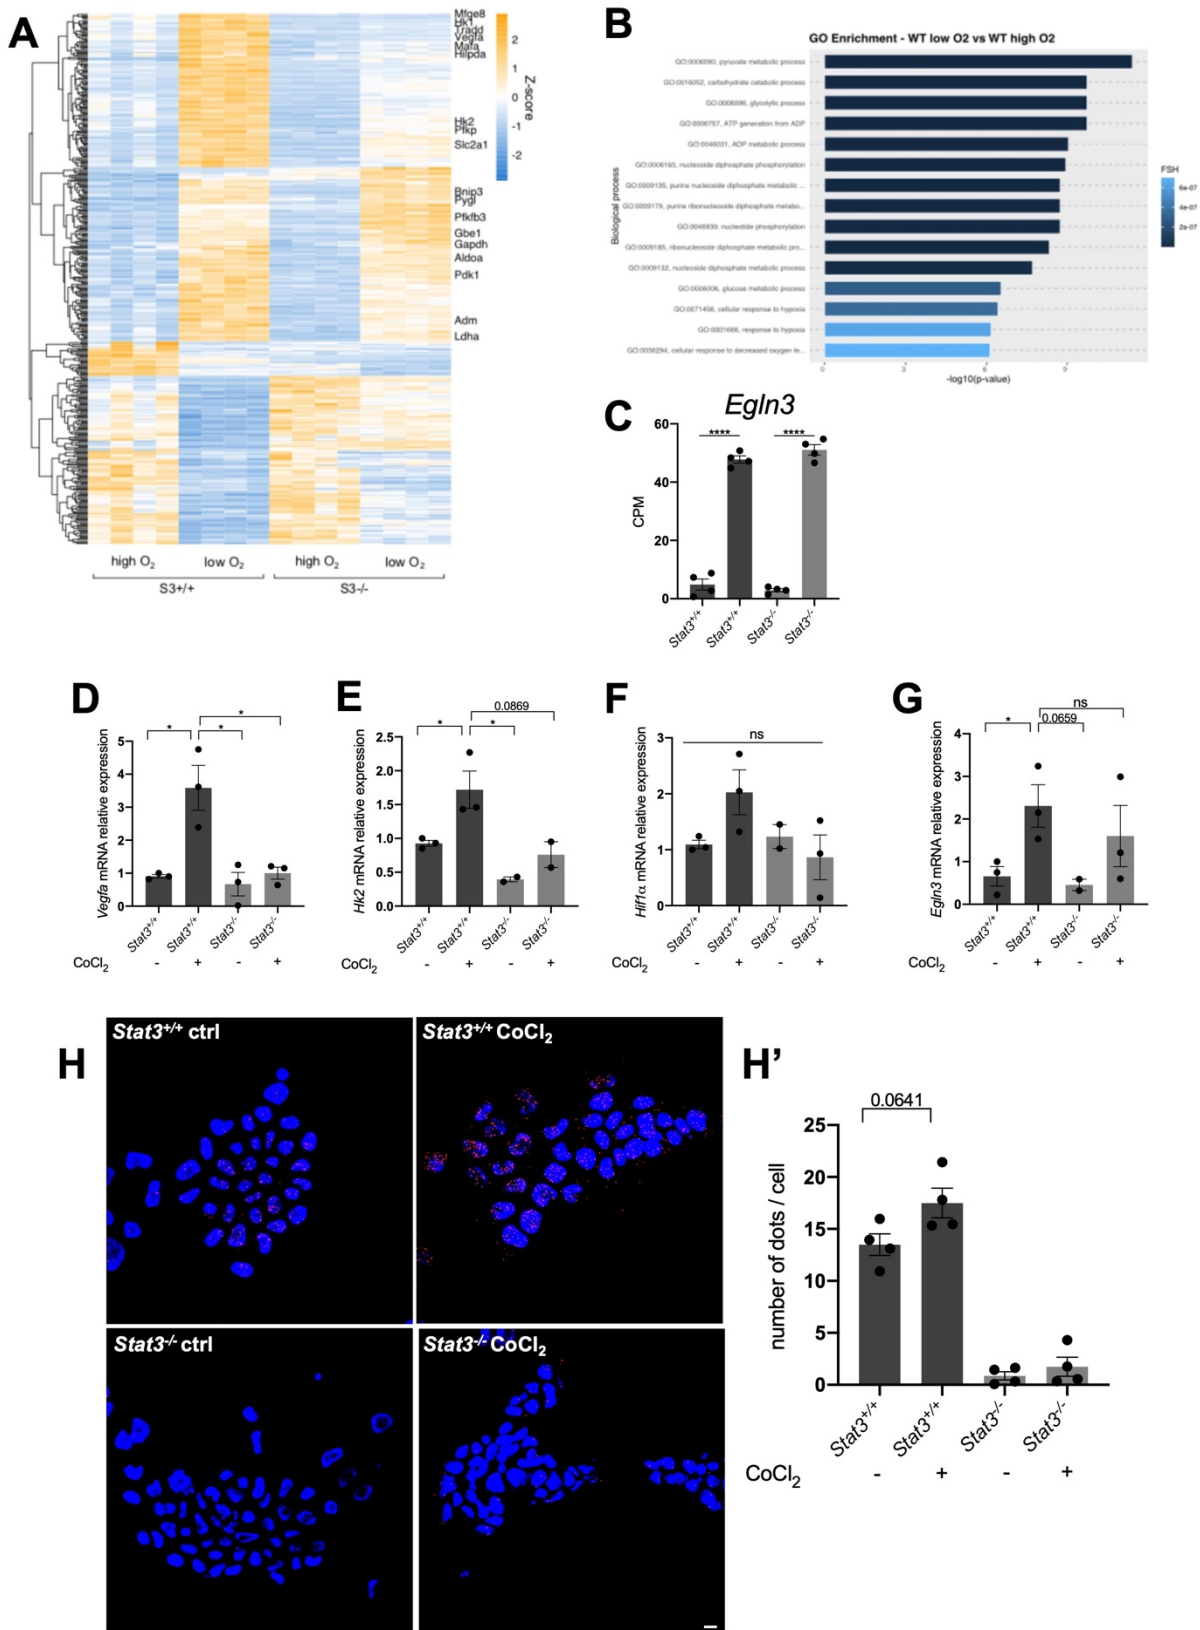

Fig. S2: **hypoxia and CoCl<sub>2</sub> induce HIF1 $\alpha$  target genes in *Stat3*<sup>+/+</sup> cells.** A: heatmap of RNAseq data reporting the expression of genes that are affected by hypoxia in *Stat3*<sup>+/+</sup> cells compared to *Stat3*<sup>+/+</sup> normoxic cells. B: GO enrichment between normoxic and hypoxic *Stat3*<sup>+/+</sup> cells. C: expression level of *Stat3*, *Stat1*, *Stat5a*, and *Stat5b* in normoxic and hypoxic *Stat3*<sup>+/+</sup> and *Stat3*<sup>-/-</sup> mESCs. D: RT-qPCR analysis of *Vegfa* mRNA expression in *Stat3*<sup>+/+</sup> and *Stat3*<sup>-/-</sup> ESCs incubated either with DMSO or CoCl<sub>2</sub>. E: RT-qPCR analysis of *Hk2* mRNA expression in *Stat3*<sup>+/+</sup> and *Stat3*<sup>-/-</sup> ESCs incubated either with DMSO or CoCl<sub>2</sub>. F: RT-qPCR analysis of *Hif1 $\alpha$*  mRNA expression in *Stat3*<sup>+/+</sup> and *Stat3*<sup>-/-</sup> ESCs incubated either with DMSO or CoCl<sub>2</sub>. G: RT-qPCR analysis of *Phd3* mRNA expression in *Stat3*<sup>+/+</sup> and *Stat3*<sup>-/-</sup> ESCs incubated either with DMSO or CoCl<sub>2</sub>. H: PLA of STAT3 and HIF1 $\alpha$  in *Stat3*<sup>+/+</sup> and *Stat3*<sup>-/-</sup> ESCs incubated either with DMSO or CoCl<sub>2</sub>. Representative pictures (H) and quantification (H'). Scale bar = 200  $\mu$ m. \*p<0.05; \*\*p<0.01; \*\*\*p<0.001; \*\*\*\*p<0.0001; ns = not significant.

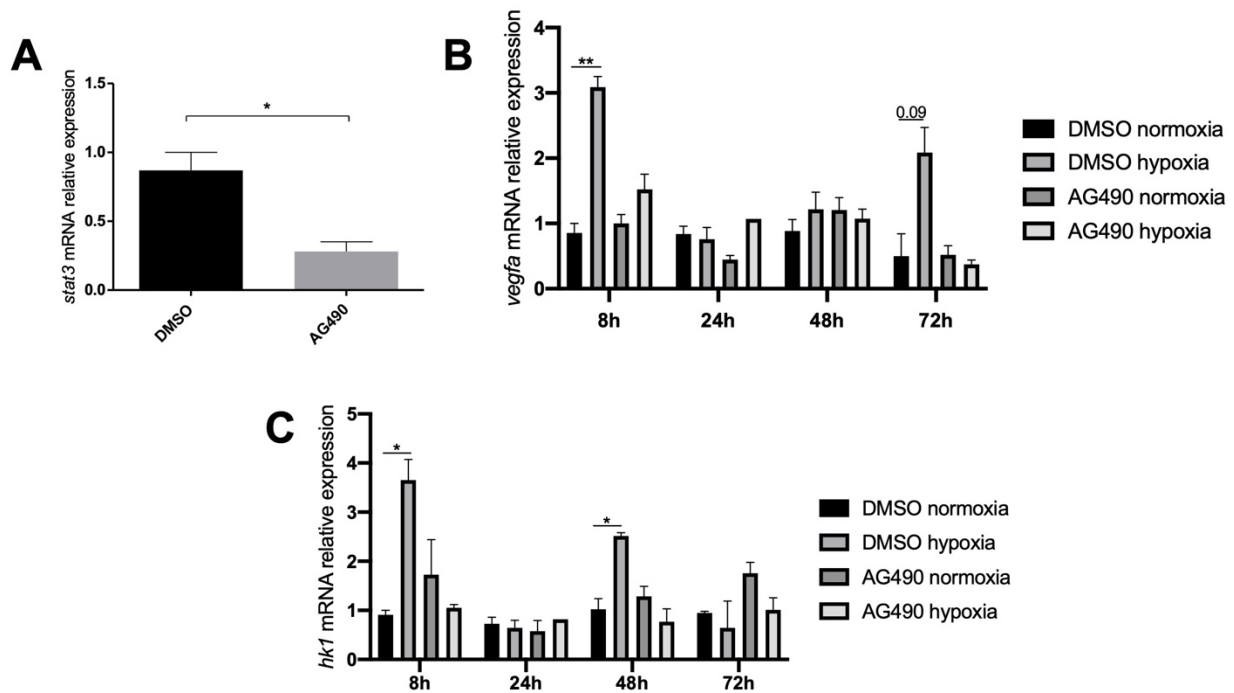

Fig. S3: **AG490 blocks transcriptional response to hypoxia.** A: *stat3* expression level of 6-dpf larvae treated with either DMSO and 50  $\mu$ M AG490 from 3 dpf to 6 dpf. B: *vegfa* expression of larvae incubated in normoxia or hypoxia and treated with either DMSO and 50  $\mu$ M AG490 for 8, 24, 48 and 72 hours. C: *hk1* expression of larvae incubated in normoxia or hypoxia and treated with either DMSO and 50  $\mu$ M AG490 for 8, 24, 48 and 72 hours. Mean $\pm$ SEM. \*p<0.05, \*\*p<0.01.

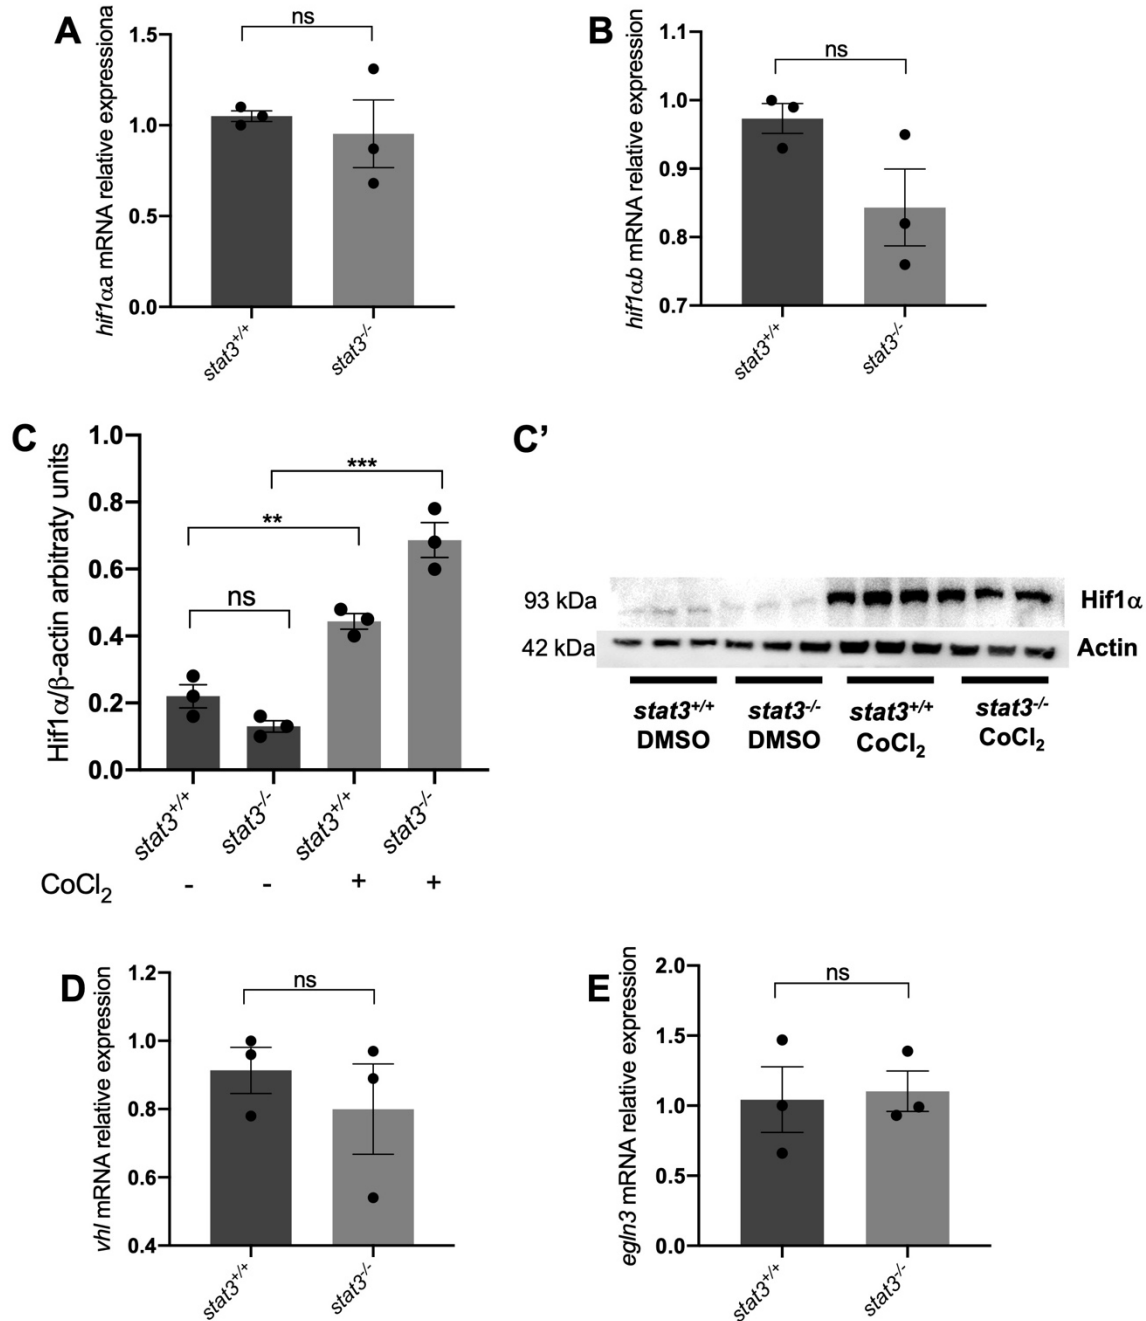

Fig. S4: *hif* genes and Hif1α stabilization are not affected in *stat3* knock-out larvae. A: *hif1aa* expression in 6-dpf *stat3*<sup>+/+</sup> larvae compared to *stat3*<sup>-/-</sup> larvae. B: *hif1ab* expression in 6-dpf *stat3*<sup>+/+</sup> larvae compared to *stat3*<sup>-/-</sup> larvae. C: western blot analysis of Hif1α protein in *stat3*<sup>+/+</sup> and *stat3*<sup>-/-</sup> 6-dpf larvae treated either with DMSO or CoCl<sub>2</sub>. Quantification (C) and representative pictures (C'). D: *vhl* expression in 6-dpf *stat3*<sup>+/+</sup> larvae compared to *stat3*<sup>-/-</sup> larvae. E: *phd3* expression in 6-dpf *stat3*<sup>+/+</sup> larvae compared to *stat3*<sup>-/-</sup> larvae. Mean±SEM. \*\*p<0.01, \*\*\*p<0.001, ns=not significant.

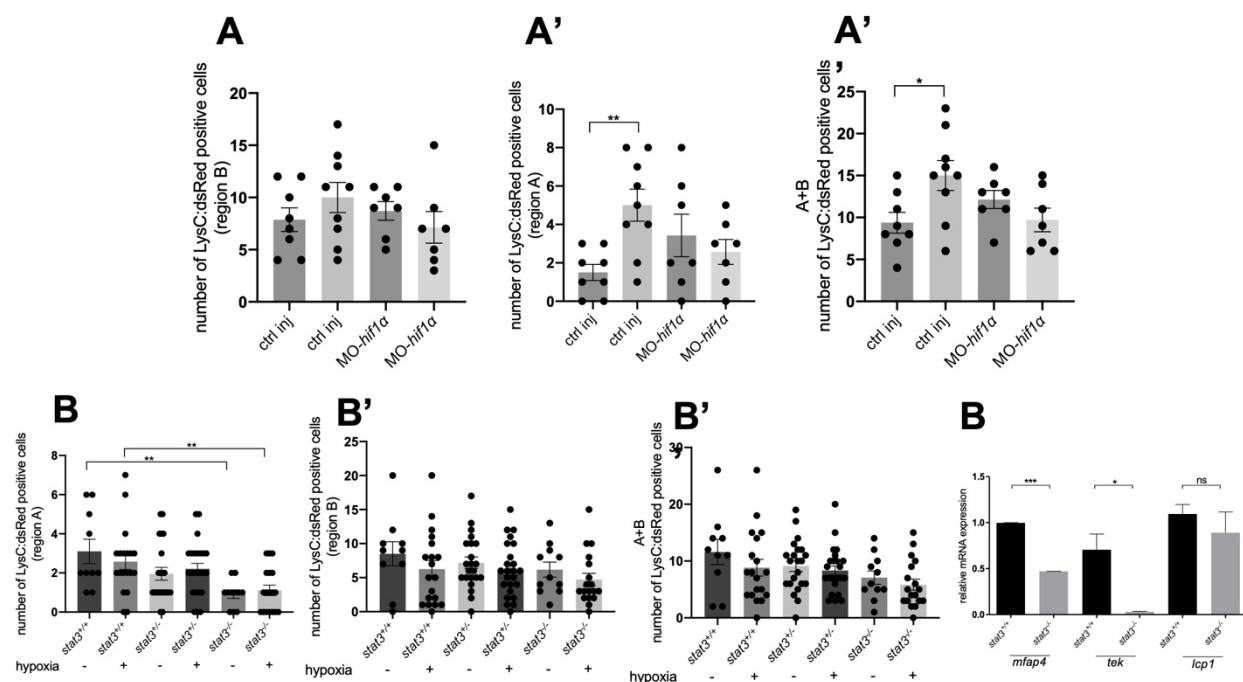

Fig. S5: **Analysis of macrophage mobilization in *stat3* mutants.** A: count of macrophages in region A (A), in region B (A') and in total (A'') in ctrl and MO-*hif1a* injected larvae after incubation either in normoxia and in hypoxia. B: count of macrophages in region A (B), in region B (B') and in total (B'') in *stat3*<sup>+/+</sup>, *stat3*<sup>+/-</sup> and *stat3*<sup>-/-</sup> larvae incubated either in normoxia and in hypoxia. B: *mfap4*, *tek* and *lcp1* expression in *stat3*<sup>+/+</sup> and *stat3*<sup>-/-</sup> 6-dpf larvae. \*p<0.05; \*\*p<0.01; \*\*\*p<0.001; ns = not significant.

| Gene           | Forward sequence      | Reverse sequence      | Reference                  |
|----------------|-----------------------|-----------------------|----------------------------|
| <i>zgapdh</i>  | GTGGAGTCTACTGGTGTCTTC | GTGCAGGAGGCATTGCTTACA | Peron <i>et al.</i> (2020) |
| <i>zstat3</i>  | TGCCACCAACATCCTAGTGT  | GCTTGTGGCACTTTTGACTGA | Peron <i>et al.</i> (2020) |
| <i>zhif1aa</i> | AGATCCTGTTCTCACGCTGG  | GTTGTAGATGGCCTGTGGAG  | This paper                 |
| <i>zhif1ab</i> | GCGACGCCATTATCTCTCTG  | AGTTTGGTCAGAGCTGGGAT  | This paper                 |
| <i>zvegfa</i>  | AAAAGAGTGC GTGCAAGACC | TTTCGTGTCTCTGTCTGGGAC | This paper                 |
| <i>zhk1</i>    | TCACACCAGAGCTGCTTACA  | AGCGAAAAGAGACAATGGCA  | This paper                 |
| <i>zegln3</i>  | CGGAGGAACATCAGAGGAGA  | CCACCATTGCCTTTGACCTC  | This paper                 |
| <i>zmfap</i>   | TGCTCTCAGATGGGAAAGATG | GCCAGTATTCTCCCTCCACA  | Gerri <i>et al.</i> (2017) |

|                                 |                        |                        |                                |
|---------------------------------|------------------------|------------------------|--------------------------------|
| <i>ztek</i>                     | AGCTCCAGGAACACTGAGGA   | ATGTGGAGCTGCTGTGTCTG   | Gerri <i>et al.</i> (2017)     |
| <i>zlcpl</i>                    | CGGAAGGCCATCAATAAGAA   | CCTTCTCCAGAGCCTTGTTG   | Gerri <i>et al.</i> (2017)     |
| <i>zflna</i>                    | ATGGTGGTGATGAGATCCCG   | TACAGGTCACCTTGCCCTTC   | This paper                     |
| <i>mActb</i>                    | CTAAGGCCAACCGTGAAAAG   | ACCAGAGGGCATAACAGGGACA | Carbognin <i>et al.</i> (2016) |
| <i>mStat3</i>                   | TGTTGGAGCAGCATCTTCAG   | GAGGTTCTCCACCACCTTCA   | Carbognin <i>et al.</i> (2016) |
| <i>mSocs3</i>                   | ATTCGCTTCGGGACTAGC     | AACTTGCTGTGGGTGACCAT   | Carbognin <i>et al.</i> (2016) |
| <i>mVegfa</i>                   | CTGTAACGATGAAGCCCTGGAG | TGGTGAGGTTTGATCCGCAT   | Longchamp <i>et al.</i> (2018) |
| <i>mHk1</i>                     | TGAAGGGCGCATTACTCCAG   | CAGGCGGGTCAAGATTCCT    | This Paper                     |
| <i>mHk2</i>                     | GAGGGTGGAGATGGAGAACC   | CAGGGGAACGAGAAGGTGAA   | This Paper                     |
| <i>mPfkp</i>                    | CTGAAGGAGCAATCGACATGC  | CAAATGCAGATGGGGTCCCT   | This Paper                     |
| <i>mHilpda</i>                  | CTGGGCATCATGTTGACCCT   | TGTGTGTTGGCTAGCTGACC   | This Paper                     |
| <i>mEgln3</i>                   | CTTCCTCCTGTCCCTCATCG   | ATACAGCGGCCATCACCATT   | Betto <i>et al.</i> (2021)     |
| <i>mHif1<math>\alpha</math></i> | GAAGTGCACCCTAACAAGCC   | GGGTTCAAAATCAGCACCA    | This Paper                     |

Table 1: list of primers used for RT-qPCR (5' → 3' sequences).
